# Supplementary material for: Comprehensive characterization of ERV-K (HML-8) in the chimpanzee genome revealed less genomic activity than humans
Source: Front Cell Infect Microbiol. 2024 Feb 22;14:1349046. doi: 10.3389/fcimb.2024.1349046 (PMC10918009; doi:10.3389/fcimb.2024.1349046)
Supplement: Supplementary file 1 [file DataSheet_1.xlsx]

## Sheet: Supplementary dataset 1
>chr11_97063674_97072831
cagacattcccagagcggccatttatagacctccccccaggaacgcattctttttccagg
gtattaatattcacattccttgctaggaaaagaatttagcaatatgtttcctacttgcac
gtccatttataggctctctgcaagaagaaaaatatggctctttttgcccgaccctgcagg
cagtcagaccttatggttgtcttctcttattccataaaaatcgctattattctgttcttt
ttcaaggtgcactgatttcatattgttcaaacacacatgttttacaatcaatttctacag
gtgacacaattatcacagtggtcctgaggtgacgtgcatcctcagcttatgaagataaca
ggattaagaggttaaaccagacataagaaattttaaaagtattatttgagaactgataaa
tgtccatattaagatgaaatcttcacaatttatgttcctctgccatggctccaaccggtc
cctccactcggggtccctgacttcccataacaTGtctccctttctttttatataaatgtg
ccatggcgatgaaggcttgttcattctctcagttttgatgcaggattctttgactggtcc
ggcacactaaaaacaaaccgattaaacagagaaacatgattccaaaatgtactacagtgg
agcccccaaaagacttaatccaagtcgtggggtttagtccagaaagactttctgccgcct
gatctaacacctcagctccaggcacaatggataaatgagcttgagaggcttcaaaaatgt
gtttcttcaatttagttatgtccaaagataaattatcttccctacccagaaggtgtcctt
tgaccatttcccatgaatgatcagtctcattgtaggaatatggtgtgatacagaaatcag
aagtattccaattgcactgcatttgcatgtgatgttcaagactcattaaccaatctccaa
gccaaataccagactgtcttaaatcattaatttgattagctaatttttgatcaatgtcct
gttgagaattccatatttgggtggaattggcttgccaatcattaacgaaatgagccattt
gaatagattggtgtaatgccactccagcagtggtggccagtgcagtgactgtaattaggc
ccatgatcacagcgattaaagtgaaaacaaatctcttagatcttttgagaatttgttgta
acacttcattaattaaatgtactgatggggaagattcccaaggtctgggtaaagttactg
gtatccagatatcctcttgagtttgaaccaacattacgcttttcctgaagtcaaaacggg
agttaacacaagtgtataaatgacaattaatgcattggacagtttgattgctcatccaaa
ttttgatatttcccactaacagcatgtaaggaggcttaacacaactctgtataggaatag
tcaggctggaggtaaacaaagcagaatatttgaatctatgttgatactgaggggaaggag
cggtggtggcaatgcccaatgttctccaccgtaaagaagtaatccaaagtgcccagggat
gccaaagaggtagaggggcatacctgggttgagaagaattatcataataccaatcagagc
cccataaaggaggactggcatcaaaaagagaagagggttcaaaggggatttttatcatgg
ggttcagaatcacgtatgtgaggggcagtagtggggacaacagacagaaaagtttcccct
tctcatacttgcagtccagacatggcaatagccaattttcaaagttctgggtgttctggg
ctcagaatggggaatatcatatgaggcctcggcggagtaatgcccctatcttcctatttt
aatggaaagaatgagatgaacctcctatgcaaagtaggatgatgatcctcatcctcccaa
taagaaataaaataagtagcctccaggcattcccttctgccagaggagcaattgtttttt
aaatagccctttcgtgcccagtctattactaaaccatatgagtcattttttaatactact
gcatgtgagttaacacagtcttcccaaattaaagttttagatgggccctcaaaattttta
ggacatggttttcctacaggtttgtattgaaagtatggggtatctcctatcactccccct
ttcatttgtcttaaaggagaaagggagaggccagagaacaaatgtccctgttcccctgtg
gctgatctctccagaaggtaagcatcctagacttgagtttctagatggatacaaccaggt
gcatgtccaaggcacagaggaggatatttataacccatagtaacattaaatgtagtgccg
ccttctggttgagtggggcaatggtcatctgtagctccaggcatccacacactatcatta
gtatagatttccacaggagcatccatacaggtgagaggtcaaataagtggaggaaaaggc
acataagcccaataagaataattttgtgtagtaggtgaatcagtttgaggggaaactggt
gagacagaaagtataaagaggagaattattaaaacctattgtaagcgagatccactgctg
aaggaggaagagaagaagagggggatgttattttcaggttaatagaaatggtgagatttt
taggttcataaggagaaaaagaaagggaattaggagaagtggaattagttagaggggtct
ccgttgccattagggaggattgaaccagacccattttgatttggcatgtcattttctgaa
gagttggcacagatctcaccaggtatgagggtggtctctgatgtggatgtctcttccctg
tgcttttcattgtcagaatgcacatgaagtttaagtctcctactgggtacccagacaggg
gattgatgatctcctggtgaaacacaagcataccctcttccccacgttataattgttcca
ggttcccaggtattggtctgggagttttcccataacactggcctgccttcatttagggac
aattttttgcctgtataatggcgttcagctgcagtcagagtattgtctttaggaacactt
agaaagtttaaagtaaataatgctaaatgtaattgggagtggggagtggttaaattatgc
ttttgttgctcagactgtttggacaattgagtttttaaagtgcgattggcctgttccacc
acagcctgtccctgaggattgtaagggattccagtaatatgggaaattccccattgttgc
ataaataaatcaaagccttactaacatatccaggggcattgtctatctttatctcatatg
aaagccccgtaactgcaaagcaagaatacagatgtcttttaacatgggccatgccttccc
ctgtttggcaagtagcccaaataatacctgaaaaggtgtctacagaaacatgtacatatg
aaagtctgccaaaggagctaacatgagtcacatccatttgccataaatcattaggagtta
ggcctctggaattaatgccaggttcctgatttggaagtacaaaaatttgtcactgagggc
agcagtggacaataagcttagcctccttccaggtgagagcaaatttatcttttaatccag
ccacattgacatgagtgagattatggaactcctgagcctcttggattgcaaaagagacca
aatagttgaccttacggtttccagcagacatgggtcctggtacagtgttatgaaatctaa
tatttgtaatatagaaagggtgtctacattggtgaaccacctgttgtaaccttgaaaatg
aagaatccaattcagaattatcaatatgtttgatactagcagtttctatatttttagtgg
catgtacaatataagcagaatcagagacaatatttaaaggtttggagaaatcctgtaagg
cagtaattacagcaattaactctgccttttgagcagaggtataaggagtagaaataagct
tgtctgtaggacccacataaccagcatttccattactggagacatcagtgaacactgtaa
tggcctcaggaatgggctgatatttggtcaatcgagggaccacccaagaagtcattttta
taaaatcaaacaatttgttttttgaatgattgtccataacaccgataaaatcagtcaagt
gaatttgccacagtatggaatgttgaaaagcggcctggactttgagctgatttaaaggaa
ccacaattaaattaggatcaaatctggaaattttaagtattctacactgagcttgtccaa
ttagggtggccatttggtccagataaacagacaaagtttttgacacagaatgaggaagaa
aacaccactccactaaatcattatgttgaactattagtccagtaggggagttcagtgaag
tgaaaaccagaagctgtaaaggctgagacggctgtaccctagacaactggcagtttggat
tctttcctccatgaattccagttccagtgaagcctcaggggtcaaagtcctgggactgca
gagattggaatctctgcacagcatagaaaacaagttagacagtgcctatgttggaatgcc
taaagtaggtcttaaataattaatgttacctaaaagtttttggaaatcatttaaggtttt
taaagaatcactcctaatctgaaacttttgaggctgaatacattctttattgaccaccag
tcctaaatattgaacaggagtggtctgttgaattttatcctgagtgatgtgtaatccagc
ctctgcaacatggtggctcagaaattgataacagtcaattaattctttatcagtgggggc
agcagttaatatatcatcaatataatgaagaatataggcctggggaaattgagctcaaac
tggtgaaagcacctgtccaacacaaagctggcaggtggtagggctattcagcattccctg
agggagtactttccattgttaacaagtttcaggctcctgattattgatagatggtacagt
agaagcaaattttttcacaatccaatttatgtaaagcaatatgaaagaaacagtctttaa
gatcaataactatgagaggccaattcttaggtattaaagcaggggaaggcatgccaggtt
ggatggctcccataggtttaattacagcattaatgtcccttaaatcagttaccatcctcc
acttgcctgatttcttttttactagaaacacaggagaattccagggggaaagaaggttcc
acatttccaagttgttaactgttcagaaactaattgagttaaaacctccagtttttcttt
agagagcagccactgctcaatccaaacaggagtttcagatttccattgtagaggaacagg
atcaggaggtgtagcagtggccatcattaaaaaggataacctaaaccagccctgtcttct
tttacagtgatttgaagaggtttagtaactccttcatgttttggactaagaccaagtcca
ggaacaaaccccatgttttctattatatattgactggaagcactataagagttacgtgga
atattaatttcagccccccattgtgccagcaagtctctaccccaaagattaatggggact
ggcacgatataaggctgaattgtacccttttgaccatcagggccagtgcaaggcaagata
aatgtgctctggtgaacttcatcagcttttccaacccctactagtcccatgttagtggga
tgtttaagccaggaggaaggccataaattagaggacataatagaaacatcagccccagta
tctactaggccctcaaacttttttccttgaatgtgtatggtgcaggtgggccattgttta
gaaattaaattaatccaataagtggctttttcactgccagagcccatcccaggtccctgt
gtcttatctccattatttaaaacaatattaggtagtaaaagtaattgagtaattgactca
ccagccggaatggagacaggaaccttggtagacaccataagtttaatcttgtcagaggaa
tcagaattaatgagaccagtatgaactgtgatacctttagtagtagtggatgccctacct
aacaccaggtccactgaaccttgaggtaaagggccggtgacccccgtggggacaattaaa
ggcaaagaattaggtagtaaatttagaggaatggaactacagagatcgaccgccctgccc
cctactgtggaggtggacaagcattgtactgggacagaagaagaggctggaacccatctg
gattgactgtaggtaaatttgtttgtgctgggggctgtgttgggactgcttgaagcagaa
atgcaacattggtctgagtctgaggtgtcccatttgatattggggcctgggactgggcct
gcttcctgtttccctggttctgtggcaagggatttccatctatatcagtcttagagtggc
aagtacttgcccaatgtttacttttatgacaacgagggcaaacactagcaggagcatttg
gccatgtttgttgagctggcttggccactgtttttaacagtgcaattttttcaagtatga
ccaagttgaccacaattatagcaggctccaagaaaagaatcagtcgagccagtttgattg
ctgtgcttcatggcctgtgcccacagaatagctttgtgggtctctgatccaatgccttca
caagctttaatatatgcaagcaacaccttgtgatcaggtaaattttgtcattggatggaa
tgcatggccattttacactcatggttcacattctcaaaagctaacatacgaaggagaatg
tcttcagcacgctcatcagagacagatttttcaacagcatcttgtaatttagccaaaaaa
tcaggatgtaattcattgtgaccctgtttaacagtagtaaaagaaacaggagcttggccc
ggggtgcataatttatcccaagctctcatacacacctttgttacttgttccatggtgaga
gcatcaatacctaattgggtggtagtgtcagagtaattatcagagcctgtgaactgagcc
tgagtaattggaatgccatcagcccaatttagctgagcctgcagatgggcctcctctgac
caccatgtatggaactataaatgctgagatggagttagaatagcttttgccaaagggccc
caatctaaaggaagcaaaatgacctctctacaaagaatctgtaataccattttaacatat
ggagaagtaggaccgtactgagtacaagcatccttgaattcttttaaaaaggtaagattg
agcggcgtatatcaatgcacttgtaccccttgagcattgggaggttccagcgcaaccgca
taagcccacacctctaatccacttgtttctttgttctggcataataagcattgcatagaa
gtttcaagaacaggcacatgagacgaagtcagcatagaagtgacaggaaaagtatgtgta
gataaaggaaactgaggttgagtaggtgagaccggtatgagagtgtgagaaaggggcact
ggaggagcagaagaggcagaagtatactggtgattattgtcccaatcctgtgcaaccaca
gtggcaggggtgtccatatgtgaagaaggctacagagaagcaggttgagtggatggcaaa
atgaccagttgagggaccaaaatgacaggagagtgaggggctgtggtggagaggggaggg
cctgcagaattacaggtaaattgtagtttggtcccggagccattacatggctccagaggc
aaaggctgcaaaggtttgaagagggaagagttagcatagatatggtcctgggctgtccga
gttggggccgtgggagctacaagtactggctcctcatgaaaagaaataagatcatcaggg
gtgacgttaagacaaaatcaccagagttagatattggatcctcaatatcctcaggtgggg
gagaagaagatgaagggagaggctgagcagataacgaaggccaagcgggagacgaaagct
gaggaagaggtagagagttgccagattcagaaaactgtggtaagtgcagggggccacagg
attggcatgtcattaggacggcacataccaaggcccaatcaccctgaacagtgacaggaa
cataatttcctttcaggaccagttcccagaattttgcaccaacatgatcccgtagttcca
catctaacgttcccttttcagggaaccaagaacagtgttcttccaccgccctgaataggg
tgaccatattttccatgggtacccaaactccccctgctttaacaggattttaatatagca
gagataagcataacgtttagactctgcgtgacctatagttaccctggacaatacatagac
aactcaccaatcgtcagggagctggacaagcatttctgtgaaccggactgatgaacgttt
ctacaaacctaccagagggaattgggttcccacatgcacttaggaaaaagaaaaccacat
tggcatgccagatattgggagaagcaaatcccaatatttcaacgtaggttctttctattt
tctgtaaatgtctgctggctgagaaatagagacagtacaaagagagaaattttatagctg
ggccaccaggaggtgacatcacatatcggtaggactgtgatgcctgcctgagtctcagac
cagcaagtttttattaagggtttcaaaaggggagggggtataagaacagagagtaggtac
aaagattacatgcttcaaagagcaaaaagcagaaccactgataaaggcctaacaaagatc
acatgcttctgagggaacagggcaaagggcaaaagcagaaccactgacaagggtccaaca
aagatcatagggcaaaaggcaaaagcagaaccactgattagggtctatgttcaacagtgc
atgtattgtcttgataaacatcttaaactatagaaaatagggttcaagagcagagaactg
atctgaccacaagtttaccagggttgagttttctcaaccctagtaagcctgagggttctg
caggagaccagggcttatctcaactgcacaagacagactttcccagagcagctttttata
gacctccccccaggaatgtgttcttttcccagggtattaatattcatattcttgctagga
aaagaatttagcaatatgtttcctgcttgcacgtccat----------------------
------------------------------------------------------------
------------------------------------------------------------
------------------------------------------------------------
------------------------------------------------------------
------------------------------------------------------------
------------------------------------------------------------
------------------------------------------------------------
------------------------------------------------------------
------------------------------------------------------------
------------------------------------------------------------
------------------------------------------------------------
------------------------------------------------------------
------------------------------------------------------------
------------------------------------------------------------
------------------------------------------------------------
------------------------------------------------------------
------------------------------------------------------------
------------------------------------------------------------
------------------------------------------------------------
------------------------------------------------------------
------------------------------------------------------------
------------------------------------------------------------
------------------------------------------------------------
------------------------------------------------------------
------------------------------------------------------------
------------------------------------------------------------
------------------------------------------------------------
------------------------------------------------------------
------------------------------------------------------------
------------------------------------------------------------
------------------------------------------------------------
------------------------------------------------------------
------------------------------------------------------------
------------------------------------------------------------
------------------------------------------------------------
------------------------------------------------------------
------------------------------------------------------------
------------------------------------------------------------
------------------------------------------------------------
------------------------------------------------------------
------------------------------------------------------------
------------------------------------------------------------
------------------------------------------------------------
------------------------------------------------------------
------------------------------------------------------------
------------------------------------------------------------
------------------------------------------------------------
------------------------------------------------------------
------------------------------------------------------------
------------------------------------------------------------
------------------------------------------------------------
------------------------------------------------------------
------------------------------------------------------------
------------------------------------------------------------
------------------------------------------------------------
------------------------------------------------------------
------------------------------------------------------------
------------------------------------------------------------
------------------------------------------------------------
------------------------------------------------------------
------------------------------------------------------------
------------------------------------------------------------
------------------------------------------------------------
------------------------------------------------------------
------------------------------------------------------------
------------------------------------------------------------
------------------------------------------------------------
------------------------------------------------------------
------------------------------------------------------------
------------------------------------------------------------
------------------------------------------------------------
------------------------------------------------------------
------------------------------------------------------------
------------------------------------------------------------
------------------------------------------------------------
------------------------------------------------------------
------------------------------------------------------------
------------------------------------------------------------
------------------------------------------------------------
------------------------------------------------------------
------------------------------------------------------------
------------------------------------------------------------
------------------------------------------------------------
------------------------------------------------------------
------------------------------------------------------------
------------------------------------------------------------
------------------------------------------------------------
--------------------------------------------
>chr19_23582963_23597406
caggaatgcaattcttttcccagagtattaatgtcaatattccttgctaagagaagaact
tagggatatcttccctacttgcacatccatttataggctctctgcaagaagaaaaatatg
gctctttttgcccgaccccgcaggcagtcagatgttatggttgtcttcccttgttcccta
aaatcgctgctattctgttctttttcaaggtgcactgatttcatattgttcaaacacgca
tgttttacaatcaatttgtacagttaacacaattatcacaaggttctgaggtgacgtaca
tcctcagcttatgaagataacaggattaagagattaaagtaagataggcataagaaatta
taagaatattatttgggaagtgataaatatccatgaaatcttcacaatttatgttcctct
gctgtggctccagccggtccctccgtttggggtccctgacttcccacaacatctctctct
ttctttttatataaacgtgccatggcgatgaaggcttgtttgttctctcaatttttacac
atgattctttgactggtccagcacactaaaaacaagccgattaaacagataatcataatt
ccaaacattactacagtggagcccccagtagacttaatccaagtcatggggtttagtcca
gaaagactttctgccacctgatctaatgcctcaactccaggcacaatgtataaaccagct
tgagagacttcaaaaatttgtttctttaatttagttatgtccaaggataaattatcttcc
ctactgagaaggtgtcctttgaccatttcccatgaatgatcagtcttgttgtaggaatat
ggtgtgatacagaaatcagaagtattccaattgcactgcatttgcatgtgatgatcgaga
ctcattagctgatccccaagccaaataacagactgtcttaaatcattcatttggtgaact
aatttttgattgatgccttgttgagaattccacatttgggtggaattggcttgccaatca
ttgacaaaatgagccatttgaatagattggtgtaatgccactccagcagtggtgaccagt
gcagtgactgtaattacacccatgatcacagcaactaaagtgaaaacaaatctcttagct
cttttgagaattcattgtaacattcattaattaaatgtactgagggggaagattcccaag
gtctgggtaaagttaccagtatccagattccttctcgagctcaaaccaacatttcacttt
tcctggagtcaaaatgggagttaatacaagtgtataaatgacaattaatacattgggcag
tttgtccaaattttgatatttcccactaacagcatgtaacgaggcttaacacaactctgt
ataggaatagtcagattggaggtaaacaaagcagaatgcttgaatctaccttgatactga
gggaggggagcagcagtggcaatgcccgatgctctccaccataatgaagcaatctgaggt
gcccagggatgccaaagaggtagaggggcatacctggattgagaagaattataatgccaa
ttagggtcccataaaggaagattggcatcaaaaagaggaaaagggtttaaaggggattta
tcatggggttcagaatcatggatgcgaggggcggcagtggtgacaacagacagaaaagtt
tccgctttccatactcacagcccggacatggcaatagccaatttccaaagttctgggtgt
tctgggcacagaatggggaatatcatacaaggcctcaggtgggtaatgcccttatcttcc
catttcaagggaaagaatgagctgaacctcctatccaaagtaaaatgatgatccgcatcc
ttccaataagaaataaaataagtagcctccaggcattccctcctgccagcagagcaattg
ttttttaaatagccctttggtgcccagtctattactaaaccatatgagtcatttttttaa
atactactgcatgtcagttaacacaatcttcccaaattaaagttttagatgggccctcaa
catttttaggacatagttttcctacaggtttatattgaaagtatggggtatctcctattg
cttcccttttcatttgtcttaaaggagaaagggagaggccggagaccaaatgtcccggtt
ctcttgtagctaatctctccggaagataagcagcccagacttgagtttgtagatggatac
aaccaggtgcatgtctgaggcacagaggagggtatttataacccctagtaacattaaatg
cagtgccgccttctcctggttgagcggggcaatggtcatctctagctccaggcatccaca
cactattgttagtatagatttctgcaggagcatccatccagatgagaggtcaaataagtg
gaggaaaaggcacataagcccaataagaataagtttgtgtagcaggtaagtcagtatgag
gggaaattggtgagacagaaagtataaggaggagaaatattaaataaaacctattttaag
caagatccagtgctgaaggaggaagagaagaacagagggatgttatttttaaggctaata
gaaatggtgagattttttggtttaggagaagtgggattagttagaggggtctccattgcc
attagggaggattgaaccagacccattttgatttgtgtgccagtttctaaggagtcggca
cagatctcaccaggtatgagggtggtctctgacacagacgtcttttctctgtggttttca
ttgtcagtattcacacgaagtttaagtctcctagtgggcacccagacaggggattgatga
tctcctggtgaaatacaagcataccctcttccgcacgttataatcgttccaggttcccag
gtattggtctgggaatttttccataacactgacttgccttcatttagggagaattttttt
tgcctgtataatggctttcagctgcagtcagagtattgtctttaggaacgttcagaaagt
ttgaagtaaacaatgctaaatgtaattgggaatgaggagtggttaaattattcttttgtt
gtttagactgtttggacaattgagtttttaaggtgtgattggccctttccacaacagcct
gtccctgaggattgtaagggattctggtaatatgggaaatttcccattgttgcataaata
aatcaaaagccttactaacatatccaggggcattgtctgtttttatctgatatggaagcc
ccataactgcaaagcaagaatacttacgtcttttaacatgggccgtgccttctcctgttt
ggcaagtagcccaaataaagcctgaaaaggtgtctacagaaacatgtacctatgaaagtc
ttgcaaaggagctaatgtgagtcacatccatttgccataaatctttaggagttaggcctc
tgggattaataccaggttcctgatttggaagtataaaaacttggccctgagagcagcagt
ggacagtaagcttagcctctttccaggtgagagcaaatttatcttttaatccagcagcat
tgacatgagtgagattatggaacttctgagcctcttgggttgcaaaagagaccaaacagt
ctaccttttggttaccagcacccatgggtcctggtaaagtggtatgagatctaatatgtg
aaatatagaaagggtgtctacattggtgaaccacctgttgtaaccttgaagataagccaa
ttcagaattatcaatatgtttaatagtagtggtttctatatttttagtggcatgcataac
ataagcagaatcagagacaatatttaaaggtttggggaaaccctgtaaggcagtaattac
agcaattaactctgccttttgagcagttgtataaggggtagaaataagcttgtctgtagg
acccacataaccagcatttccgttactggagccatcagtgaacgctgtaacggcctcagg
aatgggctgatctttggtcagtcgagggaccacccaataagtcatttttataaaatcaaa
caatttgttttttggaaaatgattgtcaataatgctgataaaatcagccaagtgaatttg
ccacagtatggaatgttgagaagcggcctgaactttgagccgatttaaacgaaccacaat
taaatttggatcaaatccggaaatttgaactattctgcaccgagcttgtccaattagggt
ggctattttagaatgaggaagaaaacaccactctactaaatcattatgttgaactattag
cccagtaggggagtggaatgaagcgaaaactagaagctgaaaaggctgagacagctgtac
cctagacaactgggcagtttggattcttctatgaattccagttccaatgaagcctcaggg
atcaaagttctgggactgtggagatgggaatcttcatgcagcatagaaaacaagttagca
catatgttggaatgcctaaagtaggtcttaaataattaatgttacctgctgagaccagct
cggtcggggagaccctaacccagcggcgctagaggaattaaagacacacacacacacaca
cacacacacacacacacacacacacacacacaaatatagagctgtgaagtgggaaatcag
gggtctcacagccttcagagctgagagccctgaacagacatttactcacgtatttattaa
cagcaaaccagtcattaacattgtttctatagatgttaaattaactaaaagtatccctta
agggaaacgaagggatgggcgtaattaattgaataggttgggctagttaactgcagcagg
aacacgcctttaagagacagattgctcaggcttttgtttgtggcttaagaatgcctttaa
gcagttttccaccctgggtgggccaggagttccttgccctcattcccgtaaaccgacaac
cttacagcttgggcattagggccattacggacatgttacagtgctgcagagattttattt
atggccagtcttggggccagtttatggccagattttggggggcttgctcccaacatgtct
cccttctttgattagcaaagagataaaaacaaaggcagttttgtcacggtgagctacttc
tggcaggagtcaggatctgcatctgcagactatacaaagacaacacagattaaaagcaca
atcatcattgaaatcacagagcttccaagtgtttttatccatttaaatgggttactagct
gctaatttgtctgcagctcctttaagcactccagttcctggcattaaggtcaggtgtgcc
tgggatgctttaaatatatatatttttaattttgctgtatctaaaaacaagattgtagag
tgtccttctagatgcttttttattctttcccaaattttgatcttattaagagcatttaat
agtttccacaaatccttatgtttagctcctagagcgggccatatcatttgaggttgaggt
gccactataccgacatggttccagataataggaacttttgctgtacttatttctaccatc
tgaccgttttgttcagatcatctgaacatagtgtgaccgtggcatgtagactgagaggtg
aaatttaacctaaacatcccgttaggggaccagttaataatgattccataggaattgttg
tgcagcacctctgcctgttctgcaaagcaatcttcctaaacaagtacgttcattttttct
aactgggtccaatcctgtttacaaataggtttttgagggtgctatgcttcaattatagga
gcaggttattatggtaaatactgagatcagaaagcatgtgtaactgtgtcagagtgattg
catccaggcattattaccagcccttactgaaggaatactcactgcagtggtgataaccgc
tatcatacctaccattaaattattcattgtgactggttgtcccgctttcctcaggttttc
ttctgccatctatgacagcttcttgatctgtccccaggtgggtggctgtgttcgacaggt
gttgctcgtgacagctggggtcctcctcagtgtcaatctcaacatggctgcaacagaggg
gtcctcgggatcctcccggaatctcttcctcggcatctggctcatgataaggtttcaggt
gtcttgatggtatccaaattggctgttgattttgcctggagaaatacaagcataacctct
accccaagttattattttacctatttcccaactttttgtaatcggatctcttcaccaaaT
AATGCTAGATTCAATTGTTTATGGGCTGTCCTGTAATCCCTATTTTGCCTCCTTTTTTTG
TTTTTgtcatcagttgttcttctgtatgaaatcgtaactgagcattttcaattaactgtg
tggaatgagaaatcacattaataggcatatcaaaaacagtcaatacttcaattacagcta
caagctctgctttttgagctgaagtatagggtgtctggaaaactttactttttgagccag
aataagaagctttaccattactagacccatctgtaaaacaatgaaaatgcttagcaggct
gcaggttgtttactgcaggaattgtaaatgcaaaccattcacagtcttgctcagctaaag
ggatagtaaagaaacagtcttttaaatctatgactattaaaggccagttttttggaatta
tagcaagagaaagcaatcctggctttaatgcccccataggttgtataactgaattgatgg
ctcttaagtcagttaacattctccattttcctgatttttttcctagttaggaaaactgga
gaattccaaggagaaaatgttggagctatgtacccattttctaattgttcagcaactaat
ttctctaaagcctccagtttttctttacttagtggccattgttccatccaaattggctca
tctgttaatcattttaaagatataggttctggaggcttaacaatgtccgccatcaaaaat
tatttcctgatttttggcgggaactttgtttttctgcttgaagcagctctttcaaacctt
gcaaatttttttctagtcccataccagggacatacctcatttcatgcattgtatgttgat
tttgagggctatataattgttctggaattagaacttgtgctccccattgttgtaataaat
ctttcccccataaatttataggtacagaagtcataatttgttgaatagtcccaggttgtc
catcgggcccttcactatgcaaaatataactactttgatatacttcagtggctttaccaa
ctccaactatgttaaattgagtgggttgatttggtcacatggacgaccagtgctgtagag
aaataattgaaatatccactcctgtatctaccaaacctttaaatttcttttcttgaatag
ctatttcacaggtaggatgttcatcagtaatttgatttacccaataagctgctttgcctt
gtttatttgtgcttccaaatcctcctgttcatttaatttcactttttcccattcccacat
atggcacaatcagaagctgtgctatgtgctttcctggctctgctttccagggaacagaag
tagatacaacaatttgaatttcccccttataatctgaatcaatgactcctgtatgtattt
gtatgccttttattttatttttttctttttcttttttttcttttttttgagatggagtct
cgctatgttgcccaggctggagtgcagtggcgcgatcttgctcactgcaagctctgcctc
ccgggttcacgccattctcctgcctcagcctcccaagtagctgggactacaggtgtccgc
caacacgcctggctaattttttgtatttttagtagagatgtagtttcaccgtgttagtca
ggatggtctcgatctcctgacctcgtgatccgcccgccttggcctcccaaagtgctagga
ttacaggtgtgagccaccgcgcccggccgtatttgtatgccttttaaacttaaactagac
cttcctaaaagtaacactatagtccctgctggcaagggtccacaaactcctgttgggacg
ttttgggggggttccccaggcagaaggctcacagcttttgtgcagcataaatctactgca
gcactaccggctgtggcaggggacagatattgcacaggggtgagtacagcctgagctgga
aatgccccagtttagaactgggcccgggacggtcccctcgtggtgtttctcgaaattggg
ttcccttctttatcaaacttagagtgacgctgactagcccagtgttttccttttttacat
tttggagacatttcaggcttaacggttttcttttttcccatatctggcgacctgacttgc
tgattttttctacattcttttttagtgtgatcatgcttcccatagttaagctccagaaaa
tggagtatttcctttgtccactctcagtcctgccactgcctgtgtcaacaaggtagcttt
atgcagattacctccgataccatcacaggccttgatataatcaactaaatgtgctttccc
tctgataggttgcagagcagcctggcaatcgggattagcgttgtcaaaagctaataactg
caacactatatcctgagcagccatatctgaaatcatctttttaagagactcctgtaaccg
agctataaaatcaacatatggttctctgggtccctgttttatagcactaaaggaagggta
ttgttccccacctgaagtgattttttcccaagctctaatgcacactcctctaagctgttc
tgtgacatcttcctgcatgaccagttgtgcatctaaaccagcccagccgccaacccccaa
aagttggtctgagttatattaatttgaggatgggcctgggcattgtgagcagcctgaatg
gaagcttcatctgcccaccaagttttcaattgttagaactgagcaggagttagacaagct
tgagtaagagcgttttaatcagtaggaatctttctactggaaacagtaacattctttaac
agtcccattacaaaaggagaacctggtccatactgacttattgcttgttttaattctttg
agtaatttaaaaggaaaaggctcaaatgtagctataatatttccctgttgatctgggggg
tgtattctaacggaactgccaagcctctaaatcaccctctcttctagcttgctgaattcc
tgcctgaatagaactaagagccgtcgctcaaggcgctgctcgaacagtcactggggcaac
tactttttgcccagtgtcctctggaaaagaaagatctggggggtcattttcttcaaaata
ataaggagggggtgcagaagggtagggataaacctctcctttgccactttatctttagct
ggcaaataaacatgctctgtaacctcttctgttacttcgctatactcttgttcctcgtca
tcagtgtgaaaaagttccaaggtggaaggaaccagaccccatacctgtcccattgttacc
ctgatgcttcctagctccccttcttactcacaccacagggattgctttaagagtacttgg
gtgtcctccaactagctttccattccaaccattgctctggcgacccttagacctggattg
gagcccccacgaatggacgccacttgctgagaccagctcggtcaggaagaccctaaccca
gtggcgctagaggaattaaagacacacacacagaaatatagaggtgtgaaatgggaaatc
aggggtctcacagccttcagagctgagagccctggacagagatttacctacgtatttatt
aacagcaaaccagtcattaacattgtttctatagatgttaaactaactaaaagtatccct
taaggaaaatgaaaggatgggccaaattaattgcagcaggaagatgcccttaagacacag
atcactcatgtttttgtttgcggcttaagaatgcctttgagcgattttccgccctgggtg
ggccaggtgttccttgccctcattcccgtaaacccagaacctttcagcttgggcgttagg
gccattatggacatgttatattgctgcagagattttgtttatggccagtcttggggccag
tttatggccagattttggggggcttgctcccaatagttacccaaaagtttttggaaatca
cttaaggttttcaaagaatctctcctaatctgaacattttgaggttgaatacattcttta
tcaactgccattcctaaatattgaacaggaggtgtctgttgaattttatcctgagcaatg
tgtaatccagcttctgtaactcagcggctcaaaaattgataacagtcaattctttgtcag
tggggtcaggaattaatatcaatataatgaagaatataggcctggggaaattgagctcga
actggtgaaagcatctgtccaatataaagctggcagatggtagggctattcagcattccc
tgaggaagtactttccattgataatgaactgcaggctcctgattattgatagatggtaaa
ggcaaatttttcacaatacgatttatgtaaagcagtatgaaagaaacagtctttaagatc
aataactatgagaggccaattcttaggtattaaagcaggggcaggcatgccaggttggac
ggctcccataggtttaattacaacattaatggcccttaaatcagttaccatccgccactt
gcctgatttcttttttactagaaacacatgagaattccaggggggaaagaagattccaca
tgtccaagttgtaactattcagaaaccaattgagttaaagcctccagtttttctttagag
agcagccactgatcaaacaggtgtttccaattcccattataaaggcacaggattaggagg
catggcattggctgccattaaaagggataacctaaaccaaccctgtcttcttttacagta
acttggagaggtttagtaattccttcatgttttgggctggtaccgagtctgggaacaaac
cccatgtttttcattatatgttgggtgggagcactataagagttatgtgaaatattaatt
tcagtcccccattgtgccagcaaatctctaccccaaagattaatggggatttgcatgata
taaggctgaattgtacccttttgaccatcagggccagtgcaaggcaagataaatgttctc
tggggaatttcatcagcttttccaacacctactagtcccatgttagtgggatgtttaagc
caggaggaaggccataaattagaggaaataatagaaacatcaatcccagtatctactagg
ccatcaaacttttttccttgaatgtgtatggtgcaggtggactattgttcagaaattaca
ttaatccaataagcggctttttcactgctggagcccatcccagggccccgtgtcttatct
cctttgtttaaaacaatattaggtagtaaaagtaattgagcaactgactcactgaccgga
atggaaacaggaaccttggcagacaccataagtttaatctcattacaggaatcagaatta
atgagactagtatgaacagtgattcctttagcagaggtggatgccctacctaacaccagg
cccactgaaccttgaggtaaagggccagtgacccccatggggacaattaaaggcaaagaa
ttaggtagtaaatttagaggaatggtactacagagatctactactccacccccctactgt
gaaggtggacaagcattgtactgagacagaagaggctgggacccatctgggttggctgta
ggtaaatttgtttgtgctgggggctgcattgggactgcttgaagtgggaacacattggtc
tgagtctgaggtgttccatttgatattggggcctgggactggccctgctttccgtttccc
tggttctgtggcaagggatttccgtctatatcagacttagaatggcaagtacttgcccaa
tgtttacctttatggcaatgtgggcaaacagtagcagcagcatttgactgtgtttgttga
gccagcttggctgcttttaagtttttaacggtgcaatttttttgagtatgaccaagttga
ctgcaattatagcaggctccaagaaaagaatcagttgagccagtttgattgccatccttc
atggcccatacccacagaatagctttgtgggtctctgatctaatgccttcacaagcttta
atatatgcaggcaacaccttgtgatcaggtaaattttgtcgttggatggaacgaatggcc
attttacactcatggttcgcattctcaaaagctaacatatgaaggagaataccttgagcg
tgctcatcagagacagatttttgaacagcatcttgtaatttaaccaaaaaatcaggatat
aattcattgtgaccctatttaacagtagtacaagaaacaggagcttcgcctggggcacgt
aatttatcccaagctctcatacacaactttgttacttgttccatggtgaaagcatcaaaa
cttgattgaacagtagtatcagattaattatcagagcctgtgaactgagcttgagtaatt
agaatgccatcagcacaatttagctgagcctgcagacgggccttctctgaccaccaggta
tggaattgtaaatgctgagatggagttagaacagcttttgccaaaatgtcccagtctaaa
ggaagcagaatgacctcagtacaaagagtctgtaataccattttagcatatggagaagta
ggaccatactgagtacaagcatccttgaattcttttaaaaacgtaagattgagaggcaca
tactgatgcgcttgtatccgagcattaggaggttccagcacgaccagataagcccacacc
tctaatccacttgtttgtttgttttggcataataagcgttgggtggaagtttcaagagca
ggaacatgagacagagtcagcatagaaatgacaggaaaagcatgtgtagataagggaaac
taagttgaggaagtcagactggtatgagagtgtgagaaaggggcatgggggagcagaaga
ggcagaagcatactggtgattattggcgtccattcatgaagaaacgtacagagaagcagg
ttgaatggatggcaaagtgactggatgagggaccaaaatgacaggagggtgaggggctgc
agtagatgggggatggtctgcagaagtacaggtgaattatagtttggtcccagagccatt
aggtggctccagaggcaaagaccgcaaaggtttggagagggaagagttagcatagatatg
gtcctgggctgtctgtgtcagggccgtgagagccacaagtattggttcttcatgaaaaga
aataagatcatctgggggtgacattaagccaaagtcaccagagttagatattgaatcctc
aacatcatcaggtgggggaggagtaggtgaagggagacgctgagcagataacaaaggccg
aacagaagaggaaagctgaggaagaggtagagagagggttgccagattcagaaaattgtg
gtaactgcagggggttatgggattggtatgtcattaggatggcacttacaaggccaaatc
accccaaacggtgacaggaacataatttcctgtcgggaccagttcctggaattttacacc
aacacgatcccatagttccacatctaacgttcccttttcaggaaagcaaggacagtgttc
ttccaccaccctgaatagggtgaccatattttccatggtcactcaaactcctccctgttt
taacaggaatttaatatagtagagataagcataatgtttagactctgtgtgacccatact
tacccccagacagtacacagacaactcaccaatcatcagggagccgaacaagcgtttctg
tggtctggaccaataaacatttctccacacctaccaaagggaatcgggttcccacatgca
cttaggataaaaccatgttggcatgccagatattgggggaacttgcccccagtatttcaa
cataggttctttctattttccataattgtcggccggtctgagaaataaagagtacaaagg
taggaattttacagctgggccgctgggggtgacatcacatatcggtaggaccatgatgcc
cacctgagccacaaaaccagcaggtttttattaaggatttcaaaaggggagggggtgtaa
gaacagggagtaggtcacaaagatcacgtgcttcaaagggcaatatcagaaactcctgat
aagggtttctacagcggtgcacgtattgtcttgataaacatcttaacagaaaacaaggtt
tgagagcagagaactggtctgaccaaaaatttaccaggctggagtttcccaatcctagta
agctgagggtactgcaggagaccagggcttatctcagtccttatctcaatcgcatagaac
agacattcccagaatggccgtttatagacctccccccaggaatg
>chr17_28556159_28565079
ctcttaatcccatcatcttcataagctgaggatatatgtcacctcaggaccctgtgatga
ttgcattatctgtacaaattgtttgtaaaacatgtgtgtttgaacaatatgaaatctggg
catcctaaaagaacaggataacagtgattttcagtgaacaagagagataaccataaggtc
tgactccctgtggggccaggcagaacagagtcatatttctctccttgcaaaagtgaatag
gagaaatatcactgaattctttttctcagcaaggaacagtcctgggaaaacaatgcgttc
ccaggggggaggtctctaaaatggccactctaggagtgtctgtcttatgcagttgtagat
aagggatgaaatacgccctggtctcctgcaatgcctgcaggcttgctaggattgggaaat
tccagcctggtgaaattctaatcagaccagttgtctgctctcaaaccctgtttctggtta
agatgtttatcaatgacaatgtgtgcacagtgggacatgaaacctcatcagcaattctaa
tttcaccttggccttgtgatctcgctctgcccccatttgccttgtgatattttattgccc
tatgaagcatgtgatctctgtgacccactccctattactacactccctccccttttgaaa
tccctaataaaaacttgctagttttgtggctcaggtgggcatcacagaacgtgccaacat
gtgatgtcacccccagaggcccagctgtaaaatttctctgttttgcaccctttttatttc
tcagactggctgacacttagggaaaatagaaaagaacctacgttgaaatactgggggctg
gttcccctgatatctggcacccagtgtggtttttcttttttcctaagtgcatgtgcgaac
ccaattccctttgataggtggggagaaacgtcatcggttcggtccaaggaaacacttgtt
cgactccctgacaactggtgagtagtctgtgtatggtccaggttaactatgggccacatg
gagtctaaacttcatgcttatctctgccatattaaactcctgtaaaaacagggcagtgtc
tgagtaaccatggaaaatatggtcactctattcagggcggtggaagaacactgtccttag
tttcctgaaaaaggaaccttagttgtagaactatgggatagtgttggcacaacattccag
gaactggtctcaacaggaaattatgttcccatcactgtttggggtgattgggccttggta
tgtgccatcctaatgacataccaatcccgtgaccccctacagttaccacaattttctgaa
tctgatgaccctccacctcttcctcaaccttcctctcctacacagcctttgttaactgat
cagcctctcccttcgcctactcctcccccaattaatgatgctgacaactcaatatctaac
tccagtgactttggcttaatgtcaccccttgatgaccttatttcttttcacgaagagctg
gtacttgtagctcctatggccccaactcagacagcccgggaccatatatatgcaaattct
tctctcttcaaacctctggagtcagctaatggctctgggaccaaactacaaagtacctac
aattattcaggccctcccccatccactgcagcccatcaccatctggtcatttcagttcct
caaccagtcaatttgccatcccctcagcctgcttctctgtacccttcttcacacagggat
gccagtaatcaccagtatacttctgctccttctgctcccccaatgcccatttctcatgct
ctcattctggtctgaccccctcaccctcaggttccctaatctacacatgcttttcctgtc
acatctatgccaactctgtctcagatgcctactcttaaaacttcaatgcaatgtttatta
tgccaaaataaacaaacaaatggattagatacatgggcttatccagtcatgctagaacct
cccaacttccaaggggtacaaatgtgtcattatgtacctctcaatcttacctttttaaaa
gaatttaaggatgcttgtactcagtatggccctacttctccttatgttaaaatggtatta
ctaactttttgtactgaggtcatttttcttcctttagactgggaccttttggcaaaagct
gttttaaccccatctcagcatttacaatttcatacctggtggtcagaggaggcccgtttg
caggcccagctaaattggactattagtgttctaattactcaggctcagctcacaggctct
gatagtttctctgatacttatgcccaattaaactttgatgctcttaccacagaacaagca
acaaaggtgtgtatgagagcttgggataaattatgtgccccaggccaagctcctgtttat
tttactatggttaaacaaggtcacactgaattataccctgattttttagctaaattacaa
gatgctgttgaaaaatctgtctctgatgagcatgctctaggtattctccttcctatgtta
gcttttgaaaatgtgagccatgagtgtaaaatggccatgtgttccatccaatgacaaaat
ttacctgatcacgaggtgttgcctgcatatattaaagcttgtgaaggcattggatcagac
acccacaaagatattctgtggccacaggccatgaaggacaccaatcaaactggccccact
aattcttttcttggagcctgctataattgcagtcaacttggtcatattcagaaaaattgc
actgttaaaaacttaaaagtgaccaagctggctcaacaaacatggccaaatgctgctgct
actgtttgcccacattgtcgcaaaggtaaacattgggcaagtacttgccactctaagaat
gatatagatggaaaccccctgccacaaaaccagggaaacaggaagcggggcaagtcccag
gccccaatatcaaatgggatgcttcagactcagaccaatgttgtgtttctgcttcaggtg
gtcccaatgcagcccccagaacaaacaaatttacctacagccaacccatatgggtcccag
cctctccttctgtctcagtacaatgcttgtccatctccacagtaaggcatggggtagtca
atctctgtagtactattcctctaaatttactacctaactctttgcctttaattgtcccca
cgggggtcactggccatttacctcaaggttcggtgggcctggtgttaggtagagcatcta
cctctgctaaaggaatcaccattcatactggtctcattaattttgattccattgatgaga
ttaaactaatcatgtctgccaaggttcctgttttcattccatccggtgaatcaattgctc
aattgcttttactacctaatattgttttaagcaaaggagataagacatgtggccatggga
cgggctctggcggtgaaaagactgcttattggattaatgtaatttctaaacaatggccca
cgtgcacattcaaggaaaaaagtttgagggcctagtagatactggggctgatgtttctat
tatttcctctaatttatggccttcctcctggcttaaacatcccagtaacatgggactagt
aggtgttggaaaagctgatgaagtttacaagagcacatttatcttgccttgcactggccc
tgatggtgaaaggggtacaattcagccttatatcatgccaatccccattaatctttgggg
gtagagatttactggcacaatgggagactgaaattaatattccacataactcttatagtg
ctcccagtcagcatatgatagaaaacatggggtttgttcctggactcagtccaaaacatg
aaggggttactaaatccctcccaattactgtaaaagaagacagggctggtttaagttatc
ctttttaatggcagccactgccatgcctcctgattctatccctttacaatggacagtttc
tgaacagttacaacttgggaatgtggaattttctctttccccctggaattctcctgtgtc
tctagtaaaaaagaaatcaggcaaatggcagatggtgaccaatttaagggccattaatgc
tgtaattaaacccatgggagccttccaacccagcatgcctacccctgctttaatacctaa
aaattggcctctcatagttattgatcttaaagatttttttatattgctttacataaattg
gattgtgaaaaatttgcttttactgtaccatctatcaataatcaagagcctacagctcat
tatcaatggaaagtacttcctcagggaatgctgaatagccctacaatcttccagctttat
gttggacaagtgctttcaccagttcaagcccaatttccccaggcctatattcttcattat
attgatggtattttaattgctgccctcactaataaagaattaattgactgttatcaaatt
ttgagctgctgtgttacagaggctggattacacaacactcaggataaaattcaacagacc
actccagttcaatatttaggaatggtggtcgataatcaacatgttcaacctcaaaaagtt
cagattaggagagattctttgaaaactttaatgacttccaaaaactcttgggtaacatta
attatttaagacctactttaggcattccaacctatgcactctctaacttgttttctatgc
tattgggagattccaatctctgcagtcccaggactttgatccctgaggcttcactagaac
tggaattcatagaagaaggaatccagacatcccagttatctagagtacagccatctcagc
cttttcagcttctctttttcacttcattgcactcccctactggactaatagttcaacata
atgatttagtagagtggtgttttcctcctcattctgtgttgaaaactttgtctgtttatt
tggaccaaacagccactctaattggacaggcacagtgtagaatacttaaaatttccgggt
ttgatctgaatttaattgtagttcctttaaatcggctcgaagttcaagccgcctttcaac
attctgtactgtggcaaattcacttggctgattttattggtgttattgacaatcattatc
caaaaaacaaattgtttgattttataaaaatgacgtcttgggtggtccctcgattaacca
aagatcagcccattcctgaggccattacagtattcactgatggctccagtaatggaaatg
ctggttatgtaggtcctacagacaagcttatttcgacctcttatacctctgctcaaaagg
cagagttaattgctgtcattactgccttacaggatttccccaaacctttaaatattgtct
ctgattctgcttatgttgtacacaccactaaaaatatagaaactgctaccatcaaatata
ttgataattctgaattggcttctttattttcaaggctacaacaggaagtttgccaacata
aacagtaaacacccattctatattacacatattagatctcataccactttaccatgaccc
atgtctgctggtaaccataaagttgactgtttggtcttttttgcaacccaagaagctcag
gagttccataatctcacttatgtcaatgctgctggattaaaagatgaatttgctgtcacc
tggaaggaggctaagcttattgttcacagctgccctcagggtcaggtctttatacttcca
aatcaggaacctggtgttaatcccagaggcctaactcctaaagatttatggcaaatagat
gtggctcatgttagctcctttgggagactttcatgtgtgcatgcttctgtagatactttc
tcagattttatctgggctacttgccaaacaggggaaggcatggcccatgttaaaaaacat
ttgtattcttgctttgcagttatggggcttccatatcaaataaagacagacaccacccct
ggatatgttagtaaggcttttgatttatttatgcaacaatggggaatttcccatactacc
agaatcccttacaatcctcagggacaggctgtggtgcaatgggtcaattgcaccttaaaa
actcaattgcccaaacagtctgaacaacgaaaacataatttaactaccccccactcccaa
ttacatttggcattgtttactttaacttttgtaaatgtccctaaagataataatctaact
gcagccaaacaccattatacaggcaaaaaattctccctaaatgaaggcaagccagtgtta
tgggaaaactcccaaaccaatacctgggaacctggcacaattataacgtgggggagagga
tatgcttgtgtttcaccaggagatcatcaatcccctgtctgggtgcccactaggagactc
aagcttcgtgtgaatactgacaatgaaaaccacagggaaaagacgtccatgtcacagacc
accctgagatgtggtgagatctgtgccacctcctcagaagctggcacaccaaatcaaaat
gggcctggttcaatactccctgatggcaacggagacccatctaactaatcccacttctcc
taaatacctttctttttctccttacaaacctaaaaatctcaccatttctattacctggaa
ataacatccctctgttcttctcttcctccttcagcactgaatctcacttacaacaggttt
tatttaatgattgtcctccttatactttctgtctcaccagtttcctctcacactgattta
cctgctacacaaaattattcttgctgggcttatgtgccttttcctccactcatttgacct
ctcacctggatggatgcttctgcagaaatctacactaatgatagtttgtggatgcctgga
gctacagatgagcattgccctgctcaaccagaagaagaaggcactgcatttaatgttact
atgggttatagatacccccgctctgtgcctcagacatgcatctggttgtatccatctaga
aacccaagtctgggctgcttatcttccagagagatcagctacagagaaaccaggacattt
tgtctccagcctctccctttctcctttaaaacaaatgaaagggggagtaatgggagatac
cccatactttcaatagaaacctgcaggaaaaccatgccctaaaaattttgagggcccatc
taaaactttaatttgggaagattgtgttaacccacatgcagtaatattaaaaaatgactc
atatggtttagtaatagactgggcaccaaaggtctatttaaaaaacaattgctcctctcc
agaagggaatgcctggaggctacttattttatttcttatcaggagaatgagaatcatcat
tctactttgcataggaggttcagctcattctttcccttaaaatgggaagataaaggcctt
accctccccgaggcctcatatgatattccccattctaagccaagaacacccagaactttg
gaaattggctcttaccatgtctggaccgtgagtatgggaaggggaaacttttctgtctat
tgtccccactaccatccctctccctcagtatcaacatagatccagacattttgctttgct
tacctccaacctgactgttcccatacagagttgtgttaagcctccttacatgctgttagt
gggaaaatcaaaatttggactaacaatcaaactgtccaatgcattgactgtcatttatac
acttgtattaactcccattttgactccaggaaaagtgtaatgttggtttgagctcaagaa
ggaatctggattccgttaactttgcccagaccttgggaatcctccccctcgatacattta
attaatgaagtgttacagtgaataacaaaaagatctaagatatttgttttcactttaatc
actgtgatcatgggcctaattatggtcactgcaatggccaccactgctggaatggtgtta
tatcagtctattcaaatggctcattttgttaatgattggcaagccaattccacccaaatg
tggaattctcagcaaagcattgatcaaaaattggctaatcaaattaatgatttaagacag
tctgttatttggcttggagattgggtagtgagtctcaaacatcacatgcaaatgcagtgt
gattggaacacttctgatttctggattacaccatattcctacagtgagactgatcattca
tggaaaatggtcaaaggacaccatctgggtagggaagacaatttaccattggacataact
aaattaaagaaacaaatttttgaagcctctcaagctcatttatccattgtgcctggagct
gaggcattagatcaggtggcagaaaacctttctggactaaaccccatgacttggattaag
tcaattggggactccagtgtagtaaattttggaattatgtttctccatttaatcagcttg
tctttagtgtgtcagaccagtaaaagaatcctgtgtcaaaattgagagaatgaacaagcc
ttcattgccatggcacatttatacgaaaGGAAAGGGAGAGGtgttgcaggaagtcaggga
ccccaaatggagggaccggctgaagccaccacagaagaacataaattgtgaagatttcat
ggacatttattagttccccaaattaatacttttataatttcttatgcctgtctttactgc
aatctctgaacataaattgtgaagatttcatggacatttatcacttccccaatcaatact
cttaaaatttccaatgcctgtctttactttaatctcttaatcccatcatcttcataagct
gaggatgtatgtcacctcaacaccctgtgatgattgcattatctgtacaaattgtttgta
agacatgtgtttgaacaatatgaaatctgggcatcctaaaagaacgggataacagtgatt
ttcagggaacaagagagataaccataaggtctgactgcctg-------------------
------------------------------------------------------------
------------------------------------------------------------
------------------------------------------------------------
------------------------------------------------------------
------------------------------------------------------------
------------------------------------------------------------
------------------------------------------------------------
------------------------------------------------------------
------------------------------------------------------------
------------------------------------------------------------
------------------------------------------------------------
------------------------------------------------------------
------------------------------------------------------------
------------------------------------------------------------
------------------------------------------------------------
------------------------------------------------------------
------------------------------------------------------------
------------------------------------------------------------
------------------------------------------------------------
------------------------------------------------------------
------------------------------------------------------------
------------------------------------------------------------
------------------------------------------------------------
------------------------------------------------------------
------------------------------------------------------------
------------------------------------------------------------
------------------------------------------------------------
------------------------------------------------------------
------------------------------------------------------------
------------------------------------------------------------
------------------------------------------------------------
------------------------------------------------------------
------------------------------------------------------------
------------------------------------------------------------
------------------------------------------------------------
------------------------------------------------------------
------------------------------------------------------------
------------------------------------------------------------
------------------------------------------------------------
------------------------------------------------------------
------------------------------------------------------------
------------------------------------------------------------
------------------------------------------------------------
------------------------------------------------------------
------------------------------------------------------------
------------------------------------------------------------
------------------------------------------------------------
------------------------------------------------------------
------------------------------------------------------------
------------------------------------------------------------
------------------------------------------------------------
------------------------------------------------------------
------------------------------------------------------------
------------------------------------------------------------
------------------------------------------------------------
------------------------------------------------------------
------------------------------------------------------------
------------------------------------------------------------
------------------------------------------------------------
------------------------------------------------------------
------------------------------------------------------------
------------------------------------------------------------
------------------------------------------------------------
------------------------------------------------------------
------------------------------------------------------------
------------------------------------------------------------
------------------------------------------------------------
------------------------------------------------------------
------------------------------------------------------------
------------------------------------------------------------
------------------------------------------------------------
------------------------------------------------------------
------------------------------------------------------------
------------------------------------------------------------
------------------------------------------------------------
------------------------------------------------------------
------------------------------------------------------------
------------------------------------------------------------
------------------------------------------------------------
------------------------------------------------------------
------------------------------------------------------------
------------------------------------------------------------
------------------------------------------------------------
------------------------------------------------------------
------------------------------------------------------------
------------------------------------------------------------
------------------------------------------------------------
------------------------------------------------------------
------------------------------------------------------------
------------------------------------------------------------
------------------------------------------------------------
--------------------------------------------
>chr1 156345936 156354251
aatggacgtgcaagtaggagagatatcgctaaattcttttcctagcaaggaatattaata
ttaataccctgggaaaggaatgcacccctgggtggaggtctataaatggccgctctggga
atgtctatcttgtgcaattgagataagggctgagataccccctggtctcctgcagaaccc
tcaggcttactagggtggggaaaaaactccgccttggtaaatttgtggtcagaccggttc
tctgctctcgaaccctgttttctgttgtttaagatgtttatcaagacaatacgtaccgct
gaacatagacccttattattagttttgctttttgccctttgccttgtgatctttgttgga
cccttaccagtagttctgcttttgccctttgtcctgttccctcagaagcatgtgatcttt
gttagacccttactagtatttctgctttttgccctttgaagtgtgtgatctttgtaccta
ctccctgttcttacaccccctctctttttgaaacccttaataaaaacttgctggtctgag
actcaggtgggcatcatggtcctaccaatatgtgatgtcacccccggtggcccagctgta
aaattcatctctttatactgtctctctttatttctcagctggctgacacttatggaaaat
agaaagaacctacgttgaaatattgggggcaggttccccCAGTAtctggcacgccaacat
ggttttctttttcctaagtgcatgtgggaacctgattccctttggtaggtgcggagaaac
tttcatcggtctggtccacagaaacgcttattcagctccctgacgattggtgagttgtct
gtgtattgtctagggtaactatgggtcatgtggagtctaaacattatgcttatctctgct
atattaaactcctgttaaaacagggaggagttcgggtacccatggaaaatattgtcaccc
tattcagggcggtggaagaacactgtccttggtttcctgaaaagggaatgttaaatgtgg
aactatgggatcatgttggtggaaaattccgggaactggtcctgacagaaaattatgttc
ccgtcactgtttgggtgattgggccttggcacatgccattctaatgacataccaatcctg
tgaccccctgcagttaccacagttttctgaatctggcaacgctctacctcttcctcagtt
tccctctcccactcggccttcgttatctgctcagcctctccgtttgcctactcctcaccc
acctgaagatattgaagatttaatatctaactctggtgactttggcttaacatcaccccc
tgatgatcttatttcttttcacgagaagccagtacttgtagctcccatggccctgacttg
gacagcctgggaccatatctatgctaactcttccctctccaaacctttgcagcctttgcc
tccagagccatctgatggctccgggaccagactacaatttacctgtaattctgcaggccc
tcccccatccaccacagcccctcaccctcctgtcatttcggtccctcaactggtcacttt
gccatccactcaacctgcttctctgtacccttcctcatgcagggacacccctgctattct
ggttgcacaagattgggacaataatcaccagtatgcttctgcctcttctgctcctccagt
gcccctttctcatgctctcatactggtctgacctcctcaacctcagtttcccttatctac
acatactttttctgtcacttctatgctgattccatctcatgtgcctgttcttgaaacttc
catgcaacgcttattatactagaacaaagaaacaagtggattagaggcatgggcttatcc
agttgtgctggaacctcccaatgctcaaggggtataagtgcatcgatatgcgctgctcaa
tcttacctttttaaaagaattcaaggatgcttgtactcagtatggtcctacttctccata
tgttaaaatggtattacagactctttgtactgagttcattttgcttccttgagactggga
ccttttggcaaaagctgttctaactccatctcagcatttacaattctgtatctggtgatc
agaggaggcatgtctgcaggctcagctaaattgggctgatggcattccaattactcaggc
tcagctcacaggctctgataattactctcacactaccgcccagttaggctttgatgctct
caccatggaacaagtaacaaaggtgtgtatgagagcttgagataaattaagtgccctggg
ccaagctcctgtttcttttactactcttaaacagggtcacaatgaattatatcttgattt
tttgggtaaattacaagatgctgttgaaaaatctgtctctgatgagtgcactcaaggtat
tctcctttgtatgttagcttttaagatcacagttcatactggtctcattaattctgattc
ctctgatgagattaaacttatggtgtctgcaaggttcctgtttccattctggctggtgag
tcaattgctcaattacttttactacctaatattgttttaaacaaaggagataagacacag
ggccttgggatgggctccggcagtgaaaaagctgcttattggattaatgtaatttctaaa
caatggcccacctgcaccatacacattcaaggaaaaaagtttgagggcctagtagatact
ggggctgatgtttctattatttcctctaatttatggccttcctcctggcttaaacatccc
accaacatgggactagtaggtgttggaaaagctgatgaagttcaccagagcacatttatc
ttgccttgcactggccctgatggtcaaaagggtaaaattcagccttatatcacaccaatc
cccattaatctttggggtagagatttgctggcacaatggtgggctgaaattaatattcca
catcactcttacggtgctcccagtcagcatataatggaaaacctggggtttgttcccaga
cttggtctcagtccaagacatgaaggaattactaaagctcttcaagttactgtaaaagaa
gacagggctggtttaggttatccttttcaatgacggccactgcttgcctcctaatcctgt
tcctctacaatggaaatctgaaacacctgtttggattgagcagcggccactctctaaaga
aaaactggaggctttaactcaattggtttctgaacagttacaacttggaaatgtggaatc
ttctctttccccctggaattctcctgtgtttctagtaaaaaagaaatcaggcaagtggag
gatggtaactgatttaagggccattaatgctgtaattaaacctatgggcgccatccaacc
tggcgtgcctgcccctgctttaatacttcagaattggcctctcatagttattgatcttaa
agactccctaccatctgccagctttatgttggacaggtgctttcaccagtttgagctcaa
tttccccaggcctatatgcttcattatattgatgatatattaattgctgcccccactgat
aaagaattaattgactgttatcaatttttgagtcaccgtgttacaaaggctggtttacac
atcactcaggataaaattcaacagaccactcctgttcagtatttaggaatggtggtcaat
aaagaatgtattcaacctcaaaaggttcagattaggagagattctttaaaaaccttaaat
gatttccaaaaacttttgggtaacattaattatttaagatctactttaggcattccaaca
tatgcgctgtctaacttgttttctacactgtgtggaaattctaatctccacagtcccagg
actttgacccctgaggcttcactggaactggaattcatggaggaaagaatccacactgcc
cagttgtctagggtacagccatctcagccttttcaacttctggttttcgcttcattgcac
tcccctactgggctaatagttcaacataatgatttagtggaacggtgttttttccctcat
tctgtgtcaaaaactttatctgtttgtctggaccaaatggccaccctaattggacaagct
tggtgtagaatacttaaaatttctggatttgatccgaatttaattgtggttcctttaaat
cggctcaaagttcaggctgcttttcaacattccatactgtggcaaattcacttggctgat
tttatcagtgttattgacaatcgttatccaaaaaacaaattgtttgattttataaaaatg
acttcttgggtggtccctcgattgaccaaagatcagcccattcctgaggccgttacagtg
ttcacggatagctccagtaatggaaatgctggttatgtgggtcctacagacaagcttatt
tctaacccttatacctctgctcagaaggcagggttaattgctgtaattactgccttacag
gatttccccaaacctttaaatattgtctctgattctgcttatgttgtacatgccactaaa
aatatagaaactgctactatcaaacatgttaataattctgaattggcttctttattttca
aggttacaacaggtggttcaccaatgtggacaccgtttctatattacacgtattagatct
cataccactttaccgggacccatgtctgctagtaaccataaggccgactgtttggtctct
tttgctatccaagaggctcacgagttccataatctcactcatgtcaatgctgctggatta
aaagataaatttgttctcacctggaaggaggctaagcttattgtccactgctgtcttcag
tgccaagtttttgtacttccaaatcaggaacctggcattaatcccagaggcctaactcct
aatgatttatggcagatggatgtgactcatgttagctcctttggcagactttcatatgta
catgtttctgtgggtaccttttcaggttttatttgggctccttgccaaacaggggaaggc
acaccccatgttaaaagacatctgtattcttgctttgcagttatggggcttccatatgag
ataaagacagacaacacccctggatatgttagtaaggctttttgatttatttatgcaaca
atgcggaatttcccatattatcagaatcccttacaatcctaagggacaagctgtggtgga
atgggccaatcgcactttaaaaactcaattgtccaaacagtctgagcaacaaaagcataa
tttaaccactccccaatcccaattacatttagcattgttactttaaactttctaaatgtt
cctaaagacaatactctgaccgcagctgaacgccattacacaggcaaaaaattctcccta
aatgaaggcaagccagtgttatggaaaaactcccaaaccaatacctgggaacctggaaca
attataacatggggaagaggttatgtttatgtttcaccaggagatcatcaatcccctgtc
tgggtgcccactaagagactgaaacttcatgtgaatactaacaatgaaaaccacagggaa
gagacatccgcatcagagaccgccctcatacctggtgagatctgtgctgactcctcagaa
actggcacaccaaatcaagaaagtctgattcaatcctctctaatggcaacggagacccct
ctaactaatcccacttctcctaattgcctttctttttctccctatgaacctaaaaatctt
accatttctattagcttaaaaataacatccccttgttcttctcttcctccttcagcactg
gatctcacttacaataggttttatttaataattctcctccttatactttctgtctcacca
gtttcccctcatactgatttacctgctaaacaaaattattcttattgggcttatgtgcct
tttcctccacttattcgacctctcccctggatggatgctcctgcagaaatctatactaac
gatagtgtgtggatgcctggagctacagatgaccgttgccccactcaaccagaagaaaac
actgcatttaatgttactatgggttataaataacctcctctgtgccttggacatgcacct
ggttggatccatctagaaactcaagtctgggctgcttatcttctggagagattagctaca
ggggaacagggacatttggtctctggcctctccctttctcctttaagacaaatgaaaagg
ggagtaataggatataccccatactttcaatataaacctgtaggaaaaccatgtcctaaa
aattttgagggcccatctaaaacttaaatttgggaagcttgtgttaactcatatgcagtg
ctattaaaaaatgactcatatggtttagtaatagactgggcaccaaagggctatttaaaa
aacaattgctcctctggtaggagggaatgcctgcaggctacttattttatttcttattgg
gaggacaaggatcatcatcctactttgcataggaggttcagctcattctttcccttaaaa
tgggaagataagggcattactcccctgaggcctcatattatatttcccattctgagccca
gaacacccagaactttggaaactggctattgccatgtctggactgcgagtatgggatggg
gaaacttttctgtctgttgtccccactaccaccccttgcatccgtgattctgaaccctgt
gataaatctcctttgaacgcttttcctctttttgatgctgatcctcctttatgggactcc
agttggcattatgataattcttcttgactgataattctgataattctctatgataattct
ttttgacttaactctacctctttggcatccccgggcacctcggattgcttctttacagtg
gagaacatcgggcgttgccaccaccgctcctctccctcagtatcaatgtagattcaaaca
ttctgctttgtttacctccagcctgaatattcctatacagagttgtgttaagcctcctta
catgctgttagtgggaaatatcaaaatttggacaaacaatcaaactgtccaatgcattaa
ttgtcatttacacacttgtgttaattcccgttttgacttcaggaaaagtgtaatgttgat
tcgagctcgagaaggaatctggatactggtaactttacccagaccttgggaatctttccc
ctcagtatgtttaattaatgaagtattataatgaattctcagaagatctaagagatttgt
tttcactttaatgactgtgaccatgggcctaattacagtcactgcactggccaccactgc
cggagtggcattacaccaatctattcaaatggctcattttgttaatgattggcaagccaa
ttacacccaaatgtggaattctcaacagggcagtgatcaaaaattagctaatcaaattaa
tgatttaagacattctgttatttggcttggagatcggctaatgagtcttgaacatcgcat
gcaaatgcagtgtgactggaatacttctgatttctgtgtcacaccatattcctacaacaa
gactgatcattcatgggaaatggtcaaaggacaccttctgggtagggaagataatttatc
cttggacataactaaattaaagaaacaaatttttgaaacctctcaagctcatttacctat
tatgcctggagctgaggcattagatcaggtggcagaaagtctttctggattaaaccccat
gacttggattaagtctgttgggggctccactgtagtacattttggaatcatgtttctctg
tttaatcggcttgtttttagtgtgccagaccagtcaaaaaatcttgcatcaaaaccgaga
gaacgaagaagtcttcatcgccatggcacatttatataaaaataaagggagagGtgtcat
gggaagtcagggaccccgaatggagggaccagctggagccacggtagacaaacgtaagtt
gtgaagatttcatggacatttatcagttcccaaataatacttttataatttcttatgcct
gtctttaatctcttaatcctgttatcttcataagctgaggatgtacatcacctcaggacc
actgtgctaattgtgttaactgtacaaattgtaaaacatgtgtgtttgaacaatataaaa
tcagtgcaccttgaaaaagaacagaataacagcaatttttagggaacaagggaagacaac
cataaggtctgactgcctatggggtcgggcaaaaagagccatatttttcttcttgcagag
agcctacaaatggacgtgcaagtagggaagatattgctaaattcttttcctagcaatgaa
tattaatattaataccctgggaaaggaatgcattcc
>chr9 31695596 31703805
tggacatatatcagttcccaaataatactcttataatttcttatgcctgtctttatttca
atctctgaacacaaattgtgaagatttcactttaatatggacatttatcacttcccaaaa
ttaatacttttataatttcttatgcctgtctttaatctcttaatcctgttatcttcgtaa
gctgagaatgtatgtcacctcaggaccagtattgtgttaactgtacaaattgattgtaaa
acatgtgtgtttgaacaatatgaaatcagtgcaccttgaaaaagaacaggataacagcga
ttttcagggaacaagggaatacaaccataaggtctgactgcctgcggggtcggacagaat
agagccatatttttcttcttgcagagagcctataaacggacgtgcaagtagggaagatat
cgttaaattcttttcctagcaaggaatattaatattaagaccctgggaaaggaattgcct
tcctggggggaggactataaacggccgctctgagagtgtctgtcttatgcggttgagata
aaggctgaaatacgccctggtctcctgcagtaccctcaggcttactaggatttggaaacc
ctgccctagtaaatttgaggtcagaccagttctctgctctcaaagtctgttttctgttgt
ttaagatgttgatcaagacaatacgtgcacagctgaacacagacctttatcagtagttct
gaatttgcccttgtcctgtttcctcagaagcatgtgatctttgttctcctttttgccctt
tgaagcatgtgatctggtgacctactccctgttcttgcactcccctcttttgaaatcctt
aataaaacttgctggctttaaggctcaggtgggcatcatggtcctactgatatgtgatgt
cacccccagaggcccagctgtaaaagtcctctctttgtattctttctctttatttctcag
ctggctgacacttacggaaaatagacagaacctacattgaaatattgggggtgggttccc
ctaatatctgccacctaatgtggttttctttttcctaagtgcatgtgggaacctgattcc
ctttggtaggtgcagagaaatgttcatcggtctggtccacagaaatgcttgttcagctcc
ctgacgattggtgagttgtctgtttattgtccaaggtaactatgggtcacgtggagtcta
aacatcatgcttatctctgctatattaaactcctgttaaaacagggtggtgttcgagtgc
ccatggaaaatgtggtcactctattcagggcagtggaggaacactgtccttggtttcctg
aaaagtgaacgttagatgtggaactatgggatcgtgttggtgcaaaattctgggaactgg
tcccaacaggaaactatgctcccatcactgtttggggtgatagggccttggtacttgtca
tcctaatgacataccaatcccatgaccccctacagttaccacaattttctgaatctggcg
accctctaccttttcctcagctttcctgtcccgctcagccttcgttatctgctcagcctc
tcccttcgcctactcctcccccacctgacgatattgaggattcaatatctaattctggtg
actttggcttaacatcacccccgatgatctcatttcttttcacaaagagctgatacttgt
agctcccacggccccaactaggacagcccgggaccatatctatgttaactcttccctctc
cagacctttgcagtctttggcaccagagctacctaatggctccaggaccaaactacagtt
tacctgtaattctgcaggccctcccccatccaccacagcccctcaccctcctgtcatttt
ggtctctcaactggtcactttgccatccattcaacccgcttctctgtacccttcttcacg
catggacaccaataaccaccagtatgcttctgcctcttctgctcccccagtgctcctttc
tcacactctcatactggtccaacctcctcaacctcagtttcctttatctacacatacttt
tcctctcacttctatgctgactctgtctcatgtgcctgctcttgtaacttccatgcaatg
cttattacaccacaacaaagaaacaagtggattagaggtgtgggcttatctagtcatgct
ggaagctccaaatgctcaaggggtacaagtgcgttgatatgcgctgctcaatcttacctt
tttaaaagaattccaggatgcttgtactcagtatagtcctacttctccatattttaaaat
ggtattacagactctttgtactgaggtaattttgcttcctttagactgggaccttttggc
aaaagctgttctaactccatctcagcatttacaattccatacctggtggtcagaggaggc
ccatctgcaggctcagctaaatcaggctgatggcattctaattaggctcagctcacaggc
tccaataattattctgacactaccacttgattaggctttgatactctcaccacagaacaa
gtaacagaggtgtgtatgagagcttgggataaattacgtgccccaggccaagctcctgtt
tcttttactactgttaaacagggtcacaatgaattatatcccgatttttggccaaattac
aagatgctgttcaaaaatccgtctctgatgagcgcactcgaggtattctccttcgtatgt
tagcttttgagaatgcaaaccatgagtgtaaaatggccatgcattctgtccagtgacaaa
atttaccagatcacaaggtgttgcctgcatatattaaagcttgtgaaggcattggatcag
agacccacaaagctattctgtgggcacgggccatgaaggacagcaatcaaactggctcaa
ctgattcttttcttggagtctgctataattgtggtcaacttggtcatactcaaaaaaatt
gcactgttaaaaacttaaaagtggcaaagccagctcaacaaacacagccaaatgctcctg
ctactgtgtgcccatgttgtcataaagataaacattgggcaagtacttgctgctctaaat
atgatatagatgaaaatcccttgccacagaaccagggaaatgggaagcagggccagtccc
aggccccaatatcaaatgggacacctcacactcaggccaatgttgcgtttccacttcaag
cggttccaatgcagcccccagcacaaaaaaatttacctacagtcaaccctgatgggtccc
agcctcttcttctgtctcagtacaatgcttctctacctccacagtagggggcagggcagt
ttcaatctctgtggtaccattcctctaaatttactccctaattatttgcttttaattgtt
cccatggggatcactggccctttacctcgaggttcggtgggcctcatgttaggttgggcc
tccacctctgctaaaggaatcatggttcatactggtctcattaattctgattcctctgat
gagattaaacttatggttctgccaaggttcctgtttccattctggctggtgagtcaattg
ctcaattacttttactatctaatattgttttaaacaaaggagataagacacagggccctg
gggatgggctctggcagtgaaaaagccgcttattggattaatgtaatttctaaataatag
cccacctgcaccatatacattcgaggaaaaaagtttgagggcctagtagatactggggct
gaagtttctattatttcctctaatttatggccttcctcctggcttaaacatcccactaac
atgggactagtaggtgttggaaaagctggtgaagttcatcagagcacatttatcttgcct
tgcactggccctgttggtcaaaacggtacaattcagccttatatcacgccaatccccatt
aatctttggggtagagatttgctggtacaatgggggcctgaaattaatattccacataac
tcatagtgctcccagttaacatataatggaaaacatggggtttgttcccggactcagtct
cagtccaaaacatgaaggaattactaacccccttcaagttactgtaaaacaagacagggc
tggtttaggttatcctttttaatggcagccactgccatgcctcctaatcctattccttta
caatggaaatcggaaacatctgtttggattgagcagtggccgctctctaaagaaaaactg
gaggctttaactcacttggtttctgaacagttatgacttggaaatgtgagaccttctctt
tccccctggaattctcctgtgtttctagtaaaaaagaaatcaggcaagtggcggatggtg
actgatttaagagccattaatgtagtaattaaacctatgggaaccgtccaacccagcatg
cctgcccctgccttaatacctaagaactggcctctcataattactgatcttaaagatttt
tttcatattgctttacataaattggattgtgaaaaatttgcctttactgtaccatctatc
gataatcaggagcctgcagcttgttagcaatggaaagcacttcctcagggaatgctgaat
agccctaccatctgccagctttatgttggacgggtgctttcaccagttcgagctcaattt
ccccaggcctatattctttataatatggatgatatattaattgctgctcccactgataaa
taattaattgactgttatcaatttttagccaccatgttacagaggctggattacacatcg
ctcaggataaaattcaacagaccactcctgttcaatatttaggaatggtagtcaataaag
aatgtattcgacctcaaaagtttcggattaggaaagattccttgaaaattttaaatgatt
tccaaagacttttgggtaacattaattatttaagacctactttaggcattccaatatatg
tgctatctaacttgttttccgtgccatgtggagattccaatctctgctgtcccaggactt
tgacccctgaggcttcactggaactggagtcagtagagggaagaatccaaactgcccagt
tgtctagggtacagcggtctcagcctttcagcttctggttttcacttcattacactcccc
tactgggctaatagttcaacgtgatgatttagtggagtggtgttttcttccttattctgt
gtcaaaaactttgtctgtttatctggaccaaatagccaccctaattggacaagctggatg
tagaatacttaaaatttctggatttgatcccaacttaattgtggttcctttaagtcggct
cgaagttcaagctgctttcaacattccatactgtggcaaattcacttggctgattttatt
ggtgttattgacaatcattatccaaaaaacaaagtttgattttataaaaatgacttcttg
ggtggtccctcgattgaccaaagatcagcccattcctgaggctgttacagtgttcactga
tggctccagtaattgaaatgctggttatgtgggtcctacagacaagcttatttctacccc
ttagacatctgctcaaaaggcagagttaattgctgtaatttctgccttacaggatttccc
caaacctttacatattgtctctgactctgcttatgttttacatgccactaaaaatataga
aaccgctactatcaaacatattgataattctgaattggcttctttattttcaaggttaca
acaggtggttcgccaatgtagacaccctttctatattacacatattagatctcataccac
tttaccaggacccatgtctgctggccaccaaaaggtcaactgtttggtctcttttgcaac
ccaagaagctcaggagttccataatctcactcatgtcaatgctgctggattaaaagataa
atttgctctcacctggaaagaggctaaccttattgtccaccgctgccctcagtgccaagt
ttttgtacttccaaatcaggaacctggcattaatctcagaggcctaactcctaatgattt
atggcaaatggatgtaactcatgttaactcctttggcagactttcatatgtacatgtttc
tgtaaacaccttttcaggctttatctgggctacttgccaaacaggggaaggcacggccca
tgttaaaagacatttgtattcttgctttgcagttacgggggtttcatatcaaataaaaac
agacatcacccctggatatgttagtaaggcttttgacttatttatgcaacaatggagaat
ttcccatattaccggaatcctttacgatcctcagggacaggctgtggtggagtgggcgaa
ttgcactttaaaaactcaattgtccaaacagtctgaacaacaaaagcataaatcgaacac
tccccactcccaattacatttgggattgtttactttagactttctaaatgttcctaaaga
caatactctcactgcagctgaacaccattatacaggcaaaaaattctgcctaaatgaagg
aaagccagtgttatggaaaaatttccaaaccaatacctgggaatctggaacaattataac
gtggggaagagagtatgcttgtgtttcaccaggagatcatcaatcccctgtctgggtacc
cactaagagacttaaacttcgtgtgaatactgacaatgaaaaccacagggaaaagacatc
tgcatcagagactgccctcatacgtggtgagacctgtgccgactcctcaaaaactggcca
gccaaatcaaaatggatctggtttgatcctccctaatggcaatggagacccctctaacta
atcccacttctcgtaattccctttctttttctccttacaaacctaaaaatctcaccattt
gtattaacctgaaaataacatccccctgttcttctcttcctccttcagcaccgaatctca
cttataataggtttcatttaatgattctcctccttatactttctgtctcacctgtttcct
ctcacactgatttacctgctacacaaaattattcttattgggcttatgtgccttttcctc
cacttatttgacctctcacctggatggatgctcctgcagaaatctatgctaacgatagtg
tgtggatgcctggagctacagatgaccattgccccgctcaaccagaagaaggcactgcat
ttaatgttactatgggttacaaataccctcctctgtgcctcggatatgcacctggttgta
tccatctagaaactcaagtctgaactgcttatcttccagagagattagctacagacaaac
caggacatttgttctccagcctctccctttctccttcaagacaaatgaaaaggggagtaa
taggagataccccatactttcaatataaacctgtaggaaaaccatgtcctaaaaattttg
agggcccatctaaaactttaatttgggaagattgtgtcaactcacatgcagtaatattta
aaaagtgacgcatatggtttagtaatagactgggcaccaaagggctatttaaaaaacaat
tgcttctctggcagaagggaatgcctggaggctacttattctatttcttattgggaggac
gaggaggatcatcatcctactttgcataggaggttcagctcattctttcccttaaaatcg
gaagataagggcattacccccgcaaggcctcgtatgatattccccattctgagcccagaa
cacccagaactttggaaattggctattgccatgtccggactgcaagtatgggaaggggaa
acttttctgtctgttgtcccctctaccgccctttgcatccgtggttctgaaccccatgat
aaatcccctttgaaaccttttcctctttttgatgtcaatcctcctttatgggactccaac
tggcattatgataattcttctctacccaggtatgcccctctacctctttggcatccctgg
gcacctccgactgcttctttatggtggagaacattgggcacggccactgctgctcctctc
cctcagtatcaacgtagattcagacattctgtcttgtttacctccaacctgactagtcct
atacaaagctatgttaagcctccttacatgctgttagtgggaaacatcaaaatttggacg
aaaaatcaaacagtccaatgcattaattgtcatgtgtacacttgtgttaactcccgtttt
gactccagaaaaagtataatgttgattcgagcttgagaaggaatctggat
>chr5 52655093 52662923
tcttgttccctaaacattgctgttatcctgttcttttttcaagatgcccagatttcatat
tgttcaaacacacatgctctacaatttgtgcagttaacgcaatcatcacagggtcctgag
gtgacatacatcctccttggcttacaagatgacaggattaagagattaaagtaaagacag
gcataggaaatcacaagggtatttattgggggagtgataagtttccatgaaatcttcata
atttatgtttagagattgcagtaaagacaggcataagaaattaaagaagtactaatttgg
ggaactaataaatgtccatgaaatcttcacaatccacattcttctgccatggcttcagtc
ggtccttccattcggggtccctgacttcccacaacatctctccctttctttttttataaa
tgtgccatggcgatgaaggcttgtttgttctctcgattttgatgcaggattctttgactg
gtccggcaaactaaaaacaagccgattaaacagagaaacataattccaaaatttactaca
gtggagcccccagtagacttaatccaagtcatggggtttaatccataaagattttctgcc
acctgatctaatgcctcagctccaagaacagtggataagtgagcttgagaggcttcaaaa
atttgtttttttaatttagttatgtccaatgataaattatgttccctaaccagaaggtgt
cctttgaccatttcccatgaatgatcagtcttgttataggaatacggggtgatacagaaa
tccaaagtattccaatcgcactgcatttgcatgtggtgttcgagactcatcacccgatct
ccaagtcaaataacagacttttgtaaatcagtaatttgatttgtcaatttttgatagatg
ccttgttgagaattccacatttgggtggaattggcttgccaatcattaacagaatgagct
gtttgaatggattggtgtaatgccattctggcaatggtggccattgcagtgacggtaatt
aggcccatgataagagcgattaaagtgaaaacaaatctcttagatctttttagaattcac
tgtagcactttattaattaaatgtattgagggggaggattcccaagatctgggtaaagtt
accagaatccagattccttctcgagcttgaaccaacattacacttttcctggagtcaaaa
tgggagttaatacaagtgtataaatgacaattaatgcattggacagtttgattgttcatc
caaattttgatatttcccactaacagcatgtaagggggcttaacactactctgtatagga
acagtcaggttggaggaaagtaaagcagaatgtctggatctacattgatactgagagaga
gtgggacggtagtggggacaacagacagaatagttttaccttcccatactcgcagtccag
acatggcaatagccaatttccaaagttctgggtgttctgggctcagaatgggagtatcat
acgaagcctggcagggataatgcctttatcttcccattttaagggaaagaatgagttgaa
cctcctatgcaaagtagaatgatgattctcattctcctgataagaaataaaataagtagc
ctccaggcattcccttccaccagaggagcaattgttttttaaatagccctttggtgccca
gtctattactaaaccatatgagtcatttcttaatattactgcatgtgagttaacacaatt
ttcccaaattaaagttttagatgggccctcaaaatttttagggcatggttttcctgcagg
tttatattgaaaatatggagttatctcccattactcctcctttcatttgttttaaaggag
aaagggagaggccagagaccaaatgtcctgttttatctgtagctgatctttacggaagat
aagcagcccagatttgagtttccagatgcataaaaccaggtgcatgtccaaggcacagag
ggggatatttacaacccatggtaacattaaatgcagtgccttcttctcctggttgagaag
ggcaatggtcatctgtggctccaggcatccacacactatggttagtgtagatttctgcag
gagcatctatccaggtgagaggtcgaataagtggaggaaaaggcacataagcccaataag
aataattatgtgtagcaggtaaatcagtgtgagaggaaactggtgagacagaaagtatga
ggaggagaatcattaaataaaacctagtgtaagtgagattgagtgctgaaggaggaaggg
aagaacagagggatttttttttttaagactaatagaaatggtgagatttttaggtttgta
aggagaaaaagaaaggtaattagaagtgggattagttagatgggtcttcattgccatcag
ggaggattgatttaaacgcattgtgatttggtgtgcctgtttctgaggagttggcacaga
tctcaccacgtctgagggcagtctctgacacagacgtctttcctctgtggttttcattgt
cagtattcacccaaagcttgagtcttctggtgggtacccacacaggggattgatgatctc
ctggtgaaacacaagcatatcctcttccccacgttataattttgccaggttcccaggtat
tggtttgggagtttttccataacactggcttgccttcatttaaggagaattttttgcctg
tataatggcattcagctgcagttagagtattatctttaggaacatttaaaaaatgtaaag
taaacaatgccaaatgtaattggaagtggggagtagttaaatcatgttttggttgttcag
actgtttggacagttgggtttttaaagtgcgattggcccattccaccacagcttgtccct
gaggattgtaagggattgcagtaatatgggaaattccccacagttgcataaatgtatcaa
aagccttactaacatatgcaggggcattgtctgtctttatttgatatggaagccccataa
ctgcaaagcaagaatacagatgttttttaacatgggccatgccttcccctgtttggcaag
tagcccagataaaacctgagaaggtatctacagagacatgcacatatgacagtctgccaa
aggagctaacatgagtcacatccatttgccataaagcattaggagttaggcctctaggtt
taatgccagtttcctgatttggaagtacgaagacctggcactgagggcagctgtgaacaa
taaacttagcctgtttccagataagagaaaatttatcttttaatccagcagcattgacat
gagtgagattatggaactcctgagcttcttgggttgtaaaagagaccaaacagtcgactt
tatggttaccggcagacatggatcctggtaaagtggtatgagatctaatatgtgtaatat
agaaagggtgtctacattggcaaatcacctgttgtaaccttgaaaataaagaagccaatt
cagaattatcaatatgtttgatagtagcagtttctatatttttagtggcatgtacaacat
aaacagaatctgagacaatattgaaagatttggggaaatcctgtaaggcagtaatcacag
taattaactccaccttttgagcagaagtataagaggtagaaataagtttgtctgtaggac
ctatataaccagcattgccattactggagccatcagtgaacgatggctcagtgaacaatg
gcctcaggaatgggttgatctttggttaattgaggaaccacccaagatgtcatttgtatg
aaatcaaacaatttgttttttggatagtgattgtcaataagccaataaaatcagccaagt
gaatttgccacagtacagaatgttgaaagggagcttgaactttgagctgatttaaaggaa
ctacaattacatttggatcaaatccagaaatttgaagtattctgcactgagcctgtccaa
ttaatatggctatttggtctagataaacagatgaagtttttgacacagtatgaggaagaa
aacaccactccactaaatcattatgttgaattattagtccagtaggggagtgtaatgaag
caaaaaccagaagctgaaaaggctgaaacggctttactctagataactgggcagtctgga
ttctttcctctatgaattccagttctagtaaagcctcaggggtcaaagtcctggggctgt
ggagatcggaagctcccctcagcgtagaaaacaagttagacaatgcataggtcggaatgc
ctaaagtaggtcttaaataattaatgttacccaaaagtttttggaagtcatttaaagttt
ttaaagaacctctcctaatttgaactttttgaggttgaatacattgtttattgaccacca
ttcctaaatattgaacaggagtggtctgttgaattttatcctgagcgatgtgtaatccag
cctctgtaacacagcggctcaaaatttggtaacagtcaattaattctttatctgtggggg
cagcaattaaaatatcatcaatataatgaagaatataggcctcaggaaattgggctcgaa
ctggtgaaagcacttgtccaacataaagctggcagattgtagggctatttagcattccct
gaggaagtactttccattgataacgagctgcaggctcctgattattgatagatggtacag
taaaagcaaatttctcacaatccgatttatgtaaagcaatatgaaaaaaaaatctttaag
atcaataactatgagaggccaatttttaggtattaaagcaggggcaggcatgccaggttg
gacggcccccataggtttaattacagtgttaatgcccttaaatcggttaccatctgccat
ttgcctgatttcttttttactagaaacacaggataattccaaggggaaagagaaggttcc
acatttccaagtagtaactgctcagaaaccaagtgagttaaagcctccagtttttcttta
gaaagtggccactgctgaatccaaacaggtgtgtcagatttacactgtaaaggaatagga
tcaggaggtgtggcagcggccgccactaaaaaggataacctgttttcttttatagtaact
gggaggagtttagtaatcccttcatgctttggactaagaccgagtccaggaacaaacccc
atattttccatcatgtgctgactgggagcactataagagttatgtggaatattaatttca
gccccccattgtgccagtaaatctctaccccaaagattaataggaattgtcatgatatag
ggctgaattgtacccttttgaccatcagggccagtgcaaggcaagataaatgtgctccca
taaacttcctcggcctttccaacacctactagtcccatgttagtgggatgtttaagccag
gaggaaggccataaactagaggaaataacagaaacatcagcaccagtatctactaggccc
tcaaactttcttccttgaatgtatatggtgcaggtgggcctttgtttagaaattacatta
atccaataagcggccttttcacctctggagcccatcccagggccacgtgtcttatctcct
ttgtttaaaatgatgttaggtagtaaaagcaattgagcgattgactcaccagccagaatg
gaaacaggaaccttggcagacgtgattaatttaatctcatcaacggaatcagaattaatg
agaccagtatgaatggtgattcctttagcagagctagatgccctacctaacaccaggccc
actgaaccttgaggtaaagggccagtgacccctgtggggacaatcaaaggcaaagagtca
ggtagtaaattcagaggaatagtactacagagatcaaccgccctgcctcctactgtggag
gtggacaagcattgtactgagacagaaggaggggctggaacccatttggtttggctgtag
gtagatttgtttgtgctgggggttgcattgggacggcctgaagcggaaacacaacatcgg
tctgagtttgaagcaccccatttgatgtcggggcctgggaccggccccgctccccatttc
cctggtggtgtggcagggggtttccatctatatcatacctagagcagcaaatatgtgccc
aatgtttacctttgcaacaacatgggcaaacagtaggagcagcatttggccatgtgtgtt
gagccggcttggccacttgtaagtttttaactgcaattttttagagtatgaccaagttgg
ccacaattacagcaggctccaagagaataattagtgggaccagtttggttggtgtctttc
aaggcccatgcccacagaatagctttgtgggtgtctgatccaatgccttcacaagcttta
atatatgcaggcaacacctcgtgatcaggtaaattttgtcattggacagaatgcatggcc
attttacattcgtggtttgcattttcaaaagctaacatacgaaagagaatgccttcagca
tgctcatcggagacagatttttcaacagcatcttgtaatttagctaaaaaatcagggtat
aattcagagtgaccttgtttaatcatggtagaagaaacaggagcttggcctggagcacat
aatttatcccaagctctcatacacaactttgttacttgttctgtggtaagggcatcaaag
tttaattgggcagaagtatcagagaaactatcagagcctgtgagctgcctgagtaactag
aatgccattactccgataatagctgagcctgcaaacgggcctcctctgaccaccagataa
aaaactgtaaatgctgagatggggttagaacagcttttgccaaaaggccaatctaaagta
attaaagtgacctccgtacaaaaagttggtaaaaccatcttaatgtaaggagaagtagga
ccatactgagtacaagcatccttaaattctttttaaaaggtaagattaagaggtacataa
ctatgcatttgtaacccttggaagttaggtgggtctagcgtgaccgggtaagtccacacg
tctaatccacttgtttctttgttttggcataataagcattgcattgaagtttcaagagta
ggcatctgagacagagttggcatggaagtgacaggaaaagcatgtgtagataaggaaaac
tgagggtgagagggtcagaccaggatgagggtgtgagaaagaggcattgggggagcagaa
ggagcagaagtatactggtgattactggtgttcacatgtgaagaagggtgcagagaagca
ggctgagtggatggtaaagtgacctattgaggaattgaaatgacaggagggtgaggagat
gaagtggacaggggagggcctgcagaaatataggtaaattgtagtttggtcccagagcca
ctaggtgattctggaggtttgagaagagaagaattagcatatacatgatcctgggctgtg
tgtcggggccgcaggagttacatgtaccagctcttcatgaaaaggaataagatcatcagg
gggtgaccataagtcaaagtcaccagagttagacattgaattctctacactgtcaggtag
gggaggagtagctggagggagaggctgatcagataacgaaggctgtgcaggagaggaagg
ttgaggaaaaggtggaggatcatcagattcagaaaactgtagtaactgtagggggtcacg
ggattggcatgtcatcaggacatcacgtaccaaggcccagtcaccccaaacagtgatggg
aacataattccctgtggagaccagttccctgaaccaacacaatcccatagttctacatct
aagtttcctttttcaggaaaccaaggacagt
>chr19 25615095 25622844
tgctgttatcctgttcttttttcaaggtgcccagatttcatatttgttcaaacacacatg
ctctacaatttgtgcagttaacgcaattatcacattgtcctgaggcaacatacatcttcc
tcagctgacaggattaagagattaaactaaagacaggcataggaaatcacaagggtattg
actggggaaatgataagtgtccatgaaatcttcacaatttatgtttagagattgcagtaa
agacaggcataagaaaatttaaaagtattaattaggtgaaataataaatgtccatgaaat
cttcacaatccacattcttcagccatggcttcagctggttcctccatttgggatccctga
cttcccacaacatctctccctttctttttatataaatgtgccatggtgatgaaggcttgt
ttgttctcttgattttgacgcaggattctttgactggtctggcacactaaaaacaagctg
attaaacagagaaacataattccaaaatttactacagtggaggccccaataaacttaatc
caagtcgtgggctttaatccataaagattttctgccacctgatctaacacctcagctcca
ggcagaatggataagtgagcttgagaggattcaaaaatttgtttctttaatttagttgtg
tccaatgataaattatcttccctacctagaaggtgtcctttgaccatttcccatgaatga
tcagtctcattataggaatatggggtgatgcagaaatccaaagtattccactcgcactgc
atttgcatgcaatgttcgaaactcactacccaatctccaagccaaataacagactgtttt
aaatcattaatttgatttgccaatttttgatcaatgccttgttgagaattccacatttgg
gtggaattggcttgccaatcattaacaaaatgagccgtttgaatggattggtgtaatgcc
attccggcagtggtggtcattgcagtgactgtaattaggcccatgataacagtgatcaaa
gtgaaaacaaatctcttggacctttttagaattcgctgtcgcacttcattaattaaatgt
attgagggggaggattcccaaggtctaggtaaagttactggaatccagattccttctcaa
gatcgaaccaatattatgcttctcttggagtcaaaatgggagttaacacaagtgtataga
tgacaattaacgcattggacagtttgattattcgtccaaattttgatatttcctactaac
agcatgtaaggaggcttaacacaactctgtatgggaatagtcaggttggaggtaagtaaa
gcagaatgtctcggtctaagttgataaggagagagtgggacagtagtgggaaaaacagtc
agaagagttttcctttcccatacttgcagtccagacatggcaatagccaatttccaaagt
tctgggtgttcaggctcagaatggggagtatcatacgaggcctgggtggggggtaatgcc
tttatcttcccattttaagagaaagcataagctgatcctcctatgcaaagtagaatgatg
attcttgttctcccgataagaaaaaaataagtagcctccaggcattcccttccaccagag
gagcaattgttttttaaatagccctttggtgcccagcctattattaaaccatatgagtca
ttttttaatattactgcatgtgagttaacacaatattcccaaattaaagttttagatggg
ccctcaaaatttttagggcatgattttcctgcaggtttatattgaaagtatggggtatct
cccattattcttcctttcatttgttttaaaggagaaagagagaggccagagaccaaatgt
cctgttttatctgtaattgatctttccggaagataagcagcctagacttgagtttccaga
tggatgcaaccaggtgcatgtctgaggcacagaggcgagtatttacaacctatggtaaca
ttaaatgcagtgccttcttctcctggttgagcagggcaatggtcatctgtggctccaggc
attcacacactatcattagtgtagatttgtgcaggagcatctacccaggtgagaggtcga
ataagtggaggaagaggcacataagcccaataagaataattatgtgtagcaggtaaatca
gtgtgagaggaaactggtgagacagtataaggaggagaatcaataaataaaacctagtgt
aaatgagattgaaggctgaaggaggaagagaagaacagagggatgttattttcaggctaa
tagaaatggtgagatttttaggtttctaaggagaaaaagaaaggtaatcaggagaagtgg
gattagttagatgggtctccattgccatcagggaggattgatttaaacccattgtgattt
ggtgtgcctttttctgagcagttggctcagatcttaccacttctgaaggtagtctctgac
acagacgtcttttctctgtggttttcattgtcagtgttcacccgaagcttgaatcttctg
gtgggttcccagacaggggattgatgatctcctggtgaaaccaggcctatcctcttccct
acgttataattgtgccagattcccaggtattggcttgggagtttttccataacactggct
tgccttcgtttaaggaaaattttttgcctgtataatggcgttcagctgcagttagagtat
tatctttagaaacatttaaaaaaattaaagtaaacaatgccaaatgtaattgggagtggg
gagtagttaaatcatgtttaggttgttcagactgtttggacaattgggtttttacagtgc
gattggcccgttccaccacagcctgtccctgaggattgtaagggattccagtaatatggg
aaattccccactgttgcataaatgaatcaaaagccttactaacatatccagggacattgt
gtctttatttgatatggaagccccataactgcaaagcaagaatacagattttttttaaca
taggccctgccttcccctgtttggcaagtagcccagataaaacctgagaaggtatctgca
gagacatgcacatatgacagtatgccaaaggagctaacatgagtcacatccattttccat
aaagcattaggagttaggcctctaggattaacacaaggttcctgatttggaagtacgaag
acctggcactgagggcagccatgaacaataaacttagcctgtttccaggtaagagcaaat
ttatcttttaatccagcggcattgacatgagtgagattatggaactcctgagcttcttgg
gttgtaaaagagaccaaacagttgactttatggttaccagcagacatgggtcctggtaaa
gtggtatgagacccaatatgtgtaatatagaaagggtgtctacgttggtgaaccacctgt
tgtaaccttgaaaataaagaagccaattcagaattatcaatatgtttgatagcagcagtt
tctatatttttagtggcatgtacaacataagcagaatctgagacaatatttaaaggtttg
aggaaatcctgtaaggcagtaatcacagcaattaactccaccttttgagcagaagcataa
gaggtagaaataagtttgtccgtaggacctacgtaaccagcattgccattactggagcca
tcagtgaacactgtaatggcctcaggaatgggttgatctttggttaatcgaggaaccacc
caagacatcatttttataaaaatcaaacaatttttttttgaataatgattgtcaataacg
ccaataaaatcagccaagtgaatttgccacagtacagaatgatgaaaggtagattgaact
tcaagccaatttaaaggaagtacaattacatttggatcaaatctagaaatttgaagtatt
ctacactgagcctgtccaattaatatggctatttggtctacataaacagacaaagttttg
gacatagaatgaggaaggaaatgccactccactaaatcattatgttgaactattagtcca
gtaggggagtgtgatgaagcaaaaaacagaagctgaaaaggctgaaacggctgtactcta
gataactgggaggtctggattctttcctctatgaattccagttctagtaaagcctcaggg
gtcaaagtcccggggctgtggagattggaatctccccacagcatagagaacaagttacac
agcgcataagttggaattcctaaagtaggttttaaataatttacgttactcaaaaggttt
tgaaagtcatttaaagtgtttaaagaatctctcctaatttgaaatttttgaggttgaata
cattgtttatcgatcaccattcctaaatattgaacaggagtgatctgttgaattttatcc
tgagcgatgtgtaatctgtcatcaatataatgaagaatatacacctcaggaaattgggct
tgaactggtgaaagctcttgtccaacataaagctggcagattgtagggctatttagcatt
ccctgaagaagtactttccaacaattatgagctgcaggctcctgattattgatagatggt
acagtaaaagcaaatttttcacaatccgatttatgtaaagcaatatgaaaaaaagcaatc
tttaagatcaataactatgagaggccaatttttaggtattagagcaggggcaggcatgcc
aggttggatggcccccataggtttaattacagtgttaatggcccttaaatcagttaccat
ccgccatttgcctgatttcttttttactagaaacacaggagaattccaaggggaaagaga
aggttccacatttccaagttgcaactgctcagaaaccaattgatttaaatcttccagttt
ttctttagaaagcggccactgctgaacccaaacgggtgtgtcagatttccattgcaaagg
aataggatcaggaggcgtggcagcagccgccacaaaaaaggatagcctaaaccagccctg
ttttcttttatagtaactgggaggggtttagtaatcccttcgtgctgtggtctgagaccg
agtccaggaacaaaccccatattttccatcatatgctgactgggagcactataagagtta
tgtggaatattaatttcagcctgccattgtgccagtaaatctctaccccaaagattaatg
ggaattggcatgatatagggctgaattttacccttttgaccatcagggccagtgcaaggc
aaaataaatgtgctctcataaacttccttggcctttccaacacctactagtcccatgtta
gtgggatgtttaagccaagaggaaggccataaactagaggaaataagagaaacatcacca
ccagtatctactaagccctcaaactttcttccttcaatgtgtatggtgcaggtgggctgt
tgtttagcaattacattaatccaataagcggccttttcactgccagagcccatcccaggg
ccatgtgtcttatctcctttgtttaaaatgatattaggtagtaaaagcaattgagcaatt
gactcaccagccagaaaggaaacaggaaccttggcagacacgatgaatttaatctcgtca
acggaatcagatttaatgagaccagtttgaatggtgactcccttagcagaggtggatgct
ctacctaacaccaggcccaccgaaccttgagataaagggccagtgacccccgtggggaca
atcaagggcaaagaatcaggaagtaaattcagaggaatagtactacagatatcaaccatc
ccacctcctactgtggaggttgacaagcattatagtgagacagaaggagaagctgggacc
catttggtttggctgtaggtagatttgtttgtgctaggggttgcattgggactgcctgaa
gtggaaacacaatgttggtcttagttggaagtgccccatttgatgttgggacctgggact
ggccccactccctatttccctgggactgtggtagggggtttccatctatatcatacttag
agtggcaaatatttgcccaaagtttacctttgcgacaacgtgggcaaacagtaggagcaa
catttggccatgtttgttgaactggcttggcctcttgtaagtttttaacagtgcaatttt
ttcaaatatgaccaagttggccacaattatagcaggctccaagagaagaattaatgggac
cagtttggttggtgtccttcatggcccgtgtccacagaatagctttgtgggtgtctgatc
caatgccttcacaagctttaatatatgcaggcaacacgtgatcaggtaaattttgttgtt
ggacagaacgcatggccaatttacattcagggattgcattttcaaaagctaatatacgaa
ggagaatgccttgagcgtgctcatcagagacagattttttcaacagcatcttgtaattta
gctaaaaaatcagggaataattcagagtgaccttgtttaactatggtaaaagaaacagga
gcttggcctggagtgcataatttattccaagctctcatacacacctttgttacttgttct
gtggtaaaggcatcaaagtttaattgggcataagcatcagagaaattatcagagcctgtg
agctgagcctgagtgattagaatgccattactcatatttagctgagcctgcaaacaggcc
tcctctgaccaccaggtacagaattgtaaatgctgacatggggttagaacagcttttgcc
aaaaggtcccaatctaaaggaattaaagtgacctcagtacaaaaagtttgtaaaactatc
ttaacgtaaggagaagtaggaccatactgagtacaagcatccttaaattcttttaaaaag
gtaagattaagaggtacataaagatgcatttgtaacacttggaagttaggtgggtctagc
acaaccagagaagtccattaatctaatccacttatttctttgttttggcataataagcat
tgcattgaagtttcaaaagtaggcatctgagatggagtcagcatagaagtgacaggaaaa
gcatgtgtagttaagggaaactgagggtgagagtgtcggaccaggatgagaatgtgagaa
agaggcattgagggagcagaacaagcagaagtatactggtgattactggtgttcacgtgt
gaagaagggtatagagaagcaatctgagtggatggtaaagtgactggttgaggaaccgaa
acgacaggagggtgaggggctgaagtgtatggtgggagggcctggagaatgataggtaaa
ttgtagtttggtcctggagccattagctgacttcagaggtttgaagagagaagaattagc
atatctgtggtactgggctgtgtactttgcagccgtgggagtttcaagtaccggctcttc
atgaaattcgtgaaaagaagtaagataagtagggggtaactttaaaccaaagttaccata
gttagacattgaattttcagcatcattaggtgggggaggagtagccaaagggagagtctg
atcagatgggggccctgtgggagaggaaggctgagggaaaggtggaggatctgaggaaaa
ggcagaaaactgtggcaactgcagggggtcatgagatcctcacaccactaagacagcagg
taccaagatccaaccaccccaaacagtgacaggaacataataccctgctgagaccagcta
ccagaatgctgtaccaacacaatcccacacttttacatctatggttcctttttcaggaaa
ccaaggacag
>chr12 51714625 51722440
tgctgttagcctgttctttttttcaaggtgcccagatttcatattgtttaaacacacatg
ctctacaatttgtgcagttaacacaattatcacatggtcctgaggagacatacatcttcc
tcatctgacaggactaagagattaaagtaaagacaggcataggaaatcacaatgatgttt
attggggaagtgataagtgtccatgaaatcttcacaatttatgtttagagattgcagtaa
atacaggaataagaaattataaaagtattaattttgggaactaataaatgtccatgaatt
cttcacaatccacattcttctgctatggtttcagctggtccctccttttggggtccctga
cttcccacaacatctctccttttctttttatatgaatgtgccatggcaatgaaggcttgt
tcattctctcaattttgatgtaggattctttgactggtccggcacactaaaaacaagctg
attaaacagagaaacataattccaaaattaactacagtggagccccagtagacttaatcc
aagtcatggggtttaatccataaagattttctgtcacctgatctaatgcctcagctccag
gcacaagggataagtgagcttgagaggtttcaaaaatttgtttctttaatttagttatgt
ccaatgataaattatcttccctaactagaaggtgtcctttgaccatttcccatgaatgat
cagtctcattataggaataggggtgatgcagaaatccaaagtattccaatcgcactgcat
ttccatgtgatgctcaaggctcactacccaatctccaagccaaataacagactgtcttaa
gtcattaatttgatttgccaatttttgatcaataccttgttgagcattccacatttgggt
ggaattggcttcccaatcattaacaaaatgagccatttgaatggactggtgtaatgtcat
tctggcagtggtggccattaatgtgactgtaattaggcccatgataacagcaattaaggt
gaaaacaaatctcttagatctttttagaattcactgtagcacttcattaattaaatgtat
tgagggggaggattcccaaggtctgggcaaagttaccagaatccagattccttctcgagc
tcaaaccaatattacacttttcctggagtcaaaatgggagttaatacaagtgtatagatg
acaattattgcattggacagtttgattattcgtccaaattttgatatttcctactaacag
catgtaaggaggcttaacacaactgtgtatgggaacagtcaggttggaggtaagtaaagc
agaatgtctggttctacgttgatactaagagagtgggacagtagtgggaataacagtcag
aatagtttttccttcccatattcacagtccagacatggcaatagccaatttccaaagttc
tgggagttctgggctcagaatggggagtatcatacgaggactgaggggggcgggtaatgc
ctttatcttcccattttaagggaaagaataagccaaacctcctatgcaaagtagaatgat
gattcttgttctcctgataagaaataaaataagtagcctccaggtattcccttctgccag
aggagcaattgttttttaaataggcttttggtgcccagtctattactaaaccatatgagt
tattttttaatattactgcatgtgagttaacacaatcttcccaaattaaagttttagatg
ggccctcaaaatttttagggcattgttttcctgcaggtttatattgaaagtatggggtat
ctcccattactccgcctttcatttgttttagaggagaaagggagaggccagagaccatat
gtcccgttttatctgtagctgatctttccagaagataagcagcccagacttgagtttcta
gatgcatgcaaccaaatgcatgtctgaggcacagaaggtggtatttataacccatggtaa
cattaaatgcagtgccttcttctcctggttgagcagggcaatggtcatctctggctccag
gcatccacacactatcattagtgtagatttctgcaggagtatctacccagatgagaagtc
ggaataagtggaggaaaagacacataagcccaataagaataattatgtgtagcaggtaaa
ttagtgtgagaggaaactggtgagacagaaagtataaggaggagaattattaaataaaca
ctagtgtaagaacgattgagtgctgaaggaggaagagaagaacagagggatgttattttc
aggcaagtagaaatggtgagacttttaggtttgtaaggagaaaaagaaaggtaatgagga
gaagtgggattggttagatgggtctccattgccatcagggaggactgatttacacccatt
gtgatttggtgtgcctgtttcttaggagtcagcacagatctcaacacgtctgagggcagt
ctctgacacagacctattttctctgtggttttcattgtcagtattcacccgaagcttgag
tcttctggtgggtacccagagaggggattgaagatctcctggtgaaacacaagcatatcc
tcttccccacgttataactgtgccaggctcctaggaattggtttaggagtttttccataa
cactggcttgcctttgtttaaggattttttttgcgtgtataatggcattcggctgcagtt
agagtattatctttagaaacattaaaaaaatttaaagtaaacaatgccaaatgtaattgg
gaatggggagtagttaaatcatgttttggttgttcagactgtttggacaattgggttttt
aaagtgtgattggccctttccaccacagcctgtccctgaggattgtaagggattccagta
atatgggaaattccccactgttgcataaatgaatcaaaagccttattaacatatccaggg
gcattgtctgttcttattcgatatggaagccccataactgcaaagcaagaatacagatgt
ttcttaacatgggtcgtgccttaccctgtttggcaagtagcccagataaaacctgagaag
gtatctacaaagacattcacatatgagagtctgccaaaggagctaacatgactcacatcc
atttgacataaagctttaggaattagacctctaggattaacaccaggttcctgatttgga
agtacgaagacctggacctgagggcagctgtgaacaataagcttagcctgtttccaagta
agagcaaatttatcttttaatccagcggcattgacatgagtgagattatggaactcctga
gcttcttgggttgtaaaagagaccaaacagtcaactttatggttactggcagacatgggt
cctgataaagtggtatgagatctaatatgtttaatatagaaagggtgtctacattggtga
accgcctgttgtaaccctgaaaataaagaagccaaattagaattatcaatatgtttgaca
gtagcagtttttaaattttagtggcatgtacaacataagtggaatctgaaacaatattta
aaggtttggggaaatcctgaaaggcagtgatcacagcagttagctctgccttttgagcag
aagtataaagggtagaaatgtttgtctgtaggacctatatagccagcattgccattactg
gagccattagtgaacactgtaatggcctcaggaatgggttgatctttggttaacctagca
accacccaagaggtcatttttataaaatcaaacaatttgtttttcggataatgattgtca
ataatgccaataaaatcagccaagtgaatttcccacagtacagaatgctgaactgtagct
tgaacttcgagctgatttaaaggaactacaattacatttggatcaaatccagaaatttga
agtattctgcaccaagcctgtccaattaatatggctatttggtttagataaacagacaaa
gtttttgacacagaatgaggaagaaaactccactccactaaatcattatgttgaactatt
agtccagtaagggagtgtaatgaagcaaaaaccagaagctgaaaagactggaatggctct
actctagataactgggcagtctggattctttcctctacgaattccaattctagtaaagcc
tcaggggtcaaagtcctagctctatggagataggaatctccccacagcatagagaacaaa
ttagacagcacacaggtcagaatgcctaaagtaggtcttagataattaatgttacccaaa
agtttttggaagtcatttaaagtttttaaagaatctctcctaatttgaactttttgaggt
tgaatacattgtttatcaaccaccattcctaaatattgaaaaggagtggtctgttgaatt
ttatcctgagcgatgtgtattccagcctctgtaacacagtggctcaaaattttgtaacag
ttgattaattctttatcagtgggggcagcaattaaaatatcatcaatataatgaagaata
taggcctcgggaaattgggctcaaactggtgaaagcacttgtccaacataaagctggcag
attgtagggctattcagcattccctgaggaagtacttcccattgataacgagctgcaggc
tcctgattattgatacatggtacagtaaaagcaaacttttcacaatccgatttatgtaaa
gcaacataaaaaacaatttttaagatcaataactgtgagaggtcaatttttaggtattaa
agcaggggcaggcatgccaggttggacagcccccataggtttaattacagcattgctggc
ccttaagtcggttaccatccaccatttgcctgatttcttttttactagaaacacaggaga
attacaaggggaaagagaaggttccacatttccaagttgtaacctctcagaaaccaattt
atttaaagcctccagtttttctttagaaagtggccaatgctgaatccagacaggcgtgtc
agatttccattgtaaaggaataggatcaggaggtgtggcagtggctgccactaaaaagga
taacctaaaccagccctgttttcttttataggaactgggagaggtttagtaatcccttca
tgctttggactgagaccaagtccaggaacaaaccccatattatccatcatatgctgactg
ggagcactataagagttatgtggaatattaacttcagccacccattgtgccagtaaatct
ctaccccaaagattagtgggaattggcatgatatagggctgaattgtacacttttgacca
tcagggccagtgcaaggcaagataaatatgctctcataaacttcgttggcctttccaaca
cctactattcccatggtagcaggaggtttaagccaagaggaaggacataaactagaggaa
ataacagaaacatcagcaacagtatctactaggccctcaaactttctcccttgaatgtgt
atggtgcaggtgggccattgtttagaaattacattaatccaataagtggccttttcactg
ctggagcccatcccagggccatgtgtcttatctcctttgtttaaaatgatattaggtagt
aaaagcaattgagcaattgactcactggccagaatggaaacaggaaccctggcagacacg
attaatttaatctcatcaacagaatcagaattaatgagacgaatatgaatggttattcct
ttatcagacgtggatgccccacctaagaccagccccactgaaccttgaggtaaagggcca
gtgacccccagggggacaatcaagggcaaagaatcaggaattaaactcagaggaatagta
ctacagagatcaaccaccccacctcctactgtggaggtggacaagcattgtactgagaca
gaaggagaggatgggaccctttggtttggctgtaggtagatttgttcgtgctgggggttg
tgttgggacagcctgaagaggaaacacaatgttggtctgagcttgaagtgtccatttgat
gttcgggcctgggaccggctccggtccccatttccctggtgttgtggcacggggtttcca
tctatatcatacttaaagcagcaaatatttgcccaaagtttactttcgtgacaacatggg
caaacagtaggagcagcatatggctgtgtttgttgaactgggttggccatctgtaaattt
tcaatagtgcaatttttttgaatattaccaagttggccacaattatggcaggctccaaga
gaattagtgggaccagtttgcttggtgtccttcatgacccgtgcacacagaatagctttg
tgggtgtcttatccaatgccttcacaagctttaatatatgcaggcaacacctcgtgattg
gtaaattttgtcattggacagaacgcatggccagtttacattcatggtttgcattttcaa
aagctagcatatgaaggagaatgtcttgagcgtgctcatcagagacagatttttcaacag
catcttgtaatttagccaaaaaatcatggtataattcagtgtgaccttgtttaaccatgg
taaaggaaacaggagcttggcctggagcaagtaattcatcccaagctctcatacacatat
ttgttacttgttctgtggtaagggcatcaaagtttaattgggcataagcatcagagaaac
tatcagagcctgtgagctgagcctgagtaattaaaatgccattactgctatttagctgag
cctgcaaatgggccttctctgaccaccaggtacaaaattgtaaatgctgagatggagtta
gaacagcttttgtcaaaaggtcccaatctaaaggaagtaaagtcacctcagtagaaaaag
tctgtaaaaccatcttaacataaggagaagtaggaccatactgagtacaggcacccttaa
attcttttaaaaaggtaagattaagaggtacataatgacacatttgcaacccttagaatt
taggtgggtctagcatgaccagataagtccacacatctaatccacttgtttctttgtttt
ggggtattatgtgttgcattgaagtttcaagagtaggcatctgagaccgagtcagcatag
aagtgacaggaaaaccctgtgtagttaagggaaactgagtgtaagaggggctgattggga
tgagagtgtgagaaagaggcatggggagagcagaaagagcggaagtgtactggtgattac
tggtgttcaagtgtgaagaagggtacagagatgcaggctgagtggacggtaaagtgactg
gttgaggaaccaaaacgacaggagggtgaggggctgcagtggatgggggagggcctggag
agtgagaggtaaattgtagtttggtcctggagccattagctgatgacagaggtttgaaga
aagaagaattagcttatctatggtactgggctgtgtgagtcatggctgcaggaatttcaa
gtactggcttttcgtgaaaagaagtaagataagtagggggtaaacttaaccagagttatc
agagttagacattgaattttcagcatcgttaggtgggggaggagtagctgaagggagagt
ctgatcagataatgaaggccatgtgggagaggaaggctgaggaaaaggcagagcaactga
ggaaaaggcagaaaactgtgggaactgccggaggtcatgggattggcacaccactaaggt
ggcatgcaccaaggcccaaccaccccaaccagtgatgggaacttaataccctgccaagat
gagtttccagaatgctgtaccaacacaatccctttcttttacataaatggttcctttttc
aggaaaccaaggacag
>chr6 73941843 73949302
attgggaaagtgataaatacccatgaaatcttcacaatttatgttcagagattgcagtaa
agacaggtgcaagaaattataaaagtattaatttggggaactaataaatgtccatgaaat
cttcacaatttatgttcttctgccatggtttcagccagtccctccattcagggtccctga
cttcccacaacatctctctctttctttttatataaatgtgccaggcgatgaaggcttgtt
tgttctcttgattttgatgcaggattctttgactggtctggcccactaaagacaagccaa
ttaaacagagaaacataattccaaaatttactatagtggagcccccagtagacttaatcc
aagtcatggggtttagtccagaaagattttctgccacctgatctaatgcctcagctccag
gcaaaatggataaatgagcttgagaggcttcaaaaatttgtttctctagttatgtccaat
gataagttatcttccctacccagaaggtgtcctttgaccatttcccatgaatgatcagtc
tcattgtaggaatacggggtgatacagaaatcagaagtgttccaatcatactgcatttgc
atgcgatgttcaagactcactacccaatctcaaagccaaataacagactgtattaaatca
ttaatttgattagccaatttttgatcaatgccttattgagaattccacacttgggaggaa
ttggcttgccaattattaagaaaatgagccatttgaatagatcgatgtaacgccattcca
gccgtggtggccattgcagttactgtaatttggcccatgatcacagtgattaaagtgaaa
acaaatctcttgcatctttttagaatttgctgtaacacttcattaattaaatgtgtcgag
ggggaggattcccaaggtctcagcaaagttaccagaatccaaattccttcttgagctaga
accaacattacacttttcctggagtcaaaatgagagttaatacaagtgtataaatgacaa
ttaatgcattggacagttggattgtttgtccaaattttgatatttcacactaacagcatg
taaggaggcttaacacaactctgtatgggaacagtcaggctggaggtaagcaaagcagaa
tgtctgaatctgtgttgatactgagagagggggatggtagcggggacaacagacagaata
gtttccccttcccatacttgcagtccagacatgacaatagacaatttccaaagttctggg
tgttctgggctcaaaatggggaatatcatatgaggccttggtggggtaatgcctttatct
tcccattttaagggaaagaatgagctgaacctcctatgcaaagtagaatgatgattctcg
ttctcccaataagaaataaaataagtagcctccagacattcccttccgccagaggagcaa
ttgttttttaaatagccctttgatacccagtctattactaaaccatatgagtcgtttttt
aatattactgcatgtaagttaacacaatcttcccaaattaaagttttagatgggccctca
aaatttttagggcatggttttcctgcaggtttatattgaaagtatggggtatctcccatt
atttcccctttcatttgttttaaaggaaaaagggagaggctggagaccaaatgtcctggt
ttctctgtagctgatctctcaggaagataagcagcccagacttgggtttctagatggata
caaccaggtgtatgtctgagcacagaggagggtatctataacccgcagtaacattaaatg
cagtgccttactctcctggttgagtggcacaatggtcatctgtagctccaggcatccaca
cactatcattagtgtagatttctgcaggagcatccaaccaggtgagaggttgaataagtg
gaggaaaaggcacataagcccgataagaataattttctttagcaggtaaatcagtgtgag
aagaaactggtgagagagaaagtataaggaggagaattattaaataaaacctagtgtaag
cgagattcagtgatgaaggaggaagagaagaacagagggatgttattttcaggctaatat
aaatggtgagatttttaggtttgtaaggggaaaaagaaaggtaattaggagaagtgggat
ttgttacatgggtctccattgccatcagggaggattgaaccagacccaatttgatttgat
gtgccagcttctgaggagttggcacagatctcaccacgtctgagggtggtctctgatgtg
gacgtcttttccctatggtttttgtcgtcagtattcacacaaagcttgagtctcctagtg
ggtatccagctatgggattgatgatctcttgatgaaacacaagcatattctctcccccac
attataattgtgccaggttcccaggtattagtttgggagtttttccataacacttgcttt
ccttcatttagggagaattttttgcctgtataatggcatttggctgtagttagattatta
tctttaggaacattaaaaaaatttaaagtaaacaatgccaaatgtaattgggagtggggg
gggggtagttaaattatatttttgttgttcagactatttggatgattgagtttttaaggt
gcgattggcctgttccaccacagtctgtccctgaggattgtaagggattccagtaatgtg
gggaattcctcactcttgcataaataaatcaaaagccttactaacatatccaggggcatt
gtctgtctttatttgatatggaagccccataactgcaaagcaagaatacagatgtttttt
aacatgggccatgccttcccctggttggcaaatagcccagataaaacctgggaaagtatc
tacagaaacatgcacatatgaaagtctacaaaaggagctaacatgagtcacatccatttg
ccataaatcattaggagttaggcctctggaattaatgccagttttctgatttggaagtac
aaaaacctgacactgaggacagctgtgaacaataagcttagcctttttccaggtaagagc
aaatttatcttttaatccagcagcactgacatgagtgagattatggaactcctgagcttc
ttgggttgcaaaagagaccaaagatttgactttatggttaccggcagtcatgggtcctgg
taaagtggtatgagatctaatatgtgtaatatagaaagggtgtttatgttggtgaaccgc
ctgttgtaaccttgaaaatcaagaagccaattcagaattatcaatatgtttgatagtagt
ggtttctatatttttagtagcatgtacaacataagcagaatcacagacagtatttaaagg
tttggggaaatactgtaaggcagtaatcacagcaattaactccaccttttgagcagaagt
ataagaggtaggaataagcttgtctgtaggacctacataaccaggattccattgctggag
ccatcagtgaacgctgtagcagcctcaggaatgggctggtctttggttaatcgagggacc
acccaagaagtcattttataaaatcaaacaatttgttttttggataatgattgtaaataa
cgccaataaaatcagccatgtgaatttgccacaatacggaatgttgaaaagcggcttgaa
ctttgggccgatttaaaggaactacaattaaattcagatcaaatccagaaattttaagta
ttctacaccgagcttgtccaattaagatggccaattggtctagataaacagacaaagttt
ttgacaaagaatgaggaagaaaataccactccactaaatcattatgttgaactattagcc
cagtaggggagtgtgatgaagcaaaaactagaagctgaaaaggttgagatggctgtactc
tagataactgggtggtctggattctttcctctatgaattccagttctagtgaagcctcag
gggtcaaagtcctgggactgtggagattggaatctccctgcagcatagaaaacaagttag
acagcacataggtcagaatgcctaaagtaggtcttaaataatgttacccaaaagtttttg
gaagttatttaaagttttcaaaaaatctctcctaatttgaactttttgaggttgaatacg
ttgtttgttgaccaccattcctaaatattgaacaggagtggtctgttgaattttatcctg
agctatgtgtaatccagcctctgtaacatggtggctcaaaatttgataacagtcaattaa
ttctttatcagtgggggcagcaattaaaatatcatcaatataatgaagaatataggcctg
gggaaactgggctcaaactggcaaaagcacttgcccaacataaagctggcagattgtagg
gctatttagcattccttgaggaagtactttccattgataatgagctgcaggctcctgatt
attgatagatggtacagtaaaagcaaatttttcacaatctgatttatgtaaagcaatata
aaaaaaatctttaagatcaataactatgagaggctaatttttaggtatcaaagcaggggc
aggcatgctgggttggatggcccccataggtttaattacagcattaatagcccttaaatc
agttaccatccgccacttgcctgatttcttttttactagaaacacaggataattccaggg
ggaaatagaaggttccacatttccaagttgtaactgtccagaaactaattgagttaaagc
ctccagtttttctttagaaagcagccgctactctatcaaaacaggtgtgtcagatttcca
ttgtaagggtataggattaggaggcatagcagcggccaccactaaaaaggatgacgtaaa
ccagctctgtcttcttttacagtaattgggaggggtttagtaatcccttcatgttttgga
ctgaggccgagtccaggaacaaaccccaggttttccatcatatgctgactgggagcacta
taagagttatgtggaatattaatttcagccccccattgtgccagtaaatctctaccccaa
agattaatggggattggcatgatataaagctgaattttacccttttgcccatcagggcca
gtgcaaggcaagataaatgtactctcataaacttcctcggcttttccaacacctactagt
cccatgttagctggatgtttaagccagcaggaaggccataaactagaggaaataatagaa
acatcagccccagtatctactaggccctcaaacattttccttaaatgtgtatggtgcaag
tgggctgttgtttagaaattacattaatccaataagtggccttttcatcactggagccca
tcccagggccacatgtcttatctcctttgtttaaaacaatattaggtagtaaaagcaatt
gaccaattaactcaccggctggaatggaaacgggaaacttggcagacatgattaatttaa
tctcatcaatggaatcagaattaatgagaccagtatgaatggtgattcctttagcagagg
tggatgccctacctaacaccaggcccactgaaccttaaggtaaagggccagcgaccccca
tggggacaattaaaggcaaagagttaggtagtaaatttagaggaatagtactacagagat
tgaccaccctgccccctactgtggaggtggacaagcattgtactgagatggaaggagagg
atgggacccatctgggttggctgtaggtaaatttgtttgtgctgggggctgcattgggac
tgcctgaggtggaaatgcaatgttggtctgagtctgaagcatcccatttgatattaggtc
ctgggactggccctgctccccatttccctggttttgtggcagggggtttccatgtatatc
atacttagagtggtacttgcccaatgtttacctttgcaacaatgtgggcaaacagtagca
gtagcatttggctgtgtttgttgagccggcttggctgcttttaagtttttaacagtgcaa
tttttccaagtatgaccaagttgaccacaattacagcaggctccaagaaaagaattagtg
gggccagtttgattggtgcccttcatggcccgtgcccacagaatagctttgtggatgtct
gatccagtgccttcacaagctttaatatatgtaggcaacacctcgtgatcaggtaaattt
tgttgttggatggaacgcatggccattttacactcatggtttgcattttcaaaagctaac
atatgagggagaataccttgagcacgttcatcagagacagagttttcaacagcgtcttgt
aatttagctaaaaaatcagggtataattcagcatgaccttgtttaaccatagtaaaaaaa
caggagcttggcctggggtgcgtaatttatcccaagctctcatacacacctttgttactt
gttttgtggtaagagcatcaaagtttaatggggcataagtattagagaaactattagagc
ctgtgagctgagcctaagtgattagaatgccattagtccgatttagctgagcctgcagac
aggcctcctctgaccaccaggtacaaaactgtaaatgctgagacggggttagaacagctt
ttgccaaaaggtcccagtctaaaggaagcaaaatgacctcagtataaaaagtttgtaata
ccattttaacataaggagaagtagggccatactgagtacaagcatccttaaattctttta
gaaaggtaagattgagaggtacataatgacgcatttgtaccccttggaagttgggaggtt
ctagcgcgaccagataagcccatgcatctaatccacttgtttctttgttttggcataata
agtgttgcactgaagtttcaagagtaggcatctgagacagttggcatagaagtgacagga
aaagcatgtgtagataagggaaactaagggtgagggagtcagaccggaatgagagtgtga
gaaaggggtgttgggggagcagaagtatactggtgattactggcgtccatgtgtgaagaa
gggtacagagaagcaggctgagtgaatggcaaagtgactggttgaggaaccgaaaggaca
ggagggtgaggggctgaagtggatgggggagggcctgaagaattataggtagattgtagt
ttggtcccggagccagtaggtgactccagaggtttgaagagagaagatttagtgtatata
tggtcccaggctgtctgagtcggggccgtgggagccacaaatactggctcttcatgaaaa
gaaataagatcattagggggtgactgtaatccagagtcaccagagttagactttgaattc
tcaacattgtcaggtggtggaggagtagccaaagggagaggctgatcagataatgaaagc
catgaggcagaggaaggttggggaagaggtggagggtcatcagattcagaaaactgtggt
aactgtagggggtcacagga
>chr9 84591713 84599232
ggaatgcatcccttttccagggtattaatattaatattccttgctaggaaaagaatttag
caatatctctcctacttgcacatccatttataggctctctgcaagaagaaaaatatggct
ctttttgcctgaccccacaggcagtcagaccttatggttgtcttcccttgttccctaaaa
attgctgttattctattctttttcaaggtgtgctgatttcatattgttcaaacacacgtt
ttacaatcaatttgtacagttaacacaattatcacagtggtcctgaggtgacgtacatcc
tcagcttacaaagataacaggattaagagattaaagtaaagacaggcataagaaattata
aaagtattatttgggaactgataaatgtccatgaaatcttcacaatttatattcctctgc
catggttccaactgttccctccattggggggtcccagacttcccgtaacatctctccctt
tctttttatataaatgagccacggtgatgaaggcttgttcattctctcggttttgacgca
ggattcgttgactggtctggcacactaaaaagccgattaaacagagaaacatgattccaa
aatttaccacagtggagcccccaatagacttaatccaagtcgtggggtttagtccagaaa
gactttctgccacctgacctaacgcctcagctccaggcacaatggataaataagcttgag
aggcttcaaaaatttttgtctttaatttagttatgtccaaggataaatgatcttccctac
ccagcaggtgtcctttgaccatttcccatgactcatcagtctcattgtaggaatatggtg
tgatacagaatcagaagtattccagtcacactgcacttgcatgtgatgttcgagactcat
tagccagtctccaagccaaataacatactgtcttaaatcgttaatttgattagctaattt
ttgatcaatgccctgttgagaattccacatttgggtggaattggcttgccaatcattaac
aaaatgagccacttgaatagattggtgtaacgccactctggcagtggtggccagtgcagt
gactgtaattaggcccatgatcacagcgattaaagtgaaaacaaatctcttagatctttt
gagaattcgctgtagcacttcattaattaaatgtactgagggggaagattcccaaggtct
gggtaaagttactggtatccagattccttcttgagctcgaaccaacatcacacttttcct
gaagtcaaaacaggagttaacacaagtgcataaatgacaatgtattggacagtttgattg
ttcatccaaattttgatatttcccactaacagcatgtaaggaggcttaacacaactatag
gaatagtcaggctggaggtaaacaaagcagaatgtttgaatctacgttgatactgaggga
gaggagcagcgtggcaatgcctgatgttctccaccataaagaagcaatctgaggtgccca
gggatgccgaagaggtagaggggcataccagggtcgagaagaattatcataatgccaatt
ggagtcccataaagggggatcggcatcaaaaagaggaagagggttcaaaggggatttatc
atggggttcagaatcacagatgtgaggggtggtagtggggacaacagacagaaaagtttc
cccttcccatactcgcagtctggacatggcaatagccaatttccaaagttctgggtgttc
tgggctcagaatggggaatatcatacaaggcctcagggccggggtgggcgggtaatgccc
ttatcttctcattttaagggaaagaacgagctgaactgcctatggaaagtaggatggtga
tcctcgtcctcccaataagaaataaaataagtagcctccagacatccccttccgccagag
gagcaattgttttttaaatagccctttggtgcccagtctattactaaaccatgtgagtca
ttttttaatactgctgcatgtgagttaacacaatcttcctaaattaaagttttagatggg
ccctcaaaatttttaggacatagttttcctatgggtttatattgaaaatatggggtatct
cctattactccccctttcatttgtcttaaaggagaaagggagaggccggagaccaaatgt
ccccattcccctgtggctgatctctccggaaggtaagcagtccagacttgagtttctaga
tggatacaaccaagtggatgtccgaggcacagaggagggtatttataacccatagtaaca
taaatgcagtgccttcttctcctggttgagtggggcagtggtcatctgtagctccaggca
tatacacactatcgttagtatagatttccgcaggagcatccatccaggtgagaggtcgaa
taagtggaggaaaaggcacataagcccaataagaataattttatatagcaggtaaatcag
tttgaggggaaactggtgagacagaaagtgtaaggaggagaattattaaataaaacctac
tgtaagcgagatccagtgctggaggagaaagagaagaacagagggatgttattttcaggc
taatagaaatggtgagatttttaggtttgtaaggagaaaaagaaaggtaaggagatgtgg
gattagttagaggggtctccgttgccgtttgggaggactgaaccagacccattttgattt
ggcctaccagtttctgaggagtccgcacagatctcaccaggtatgagggcagtctctgac
gcggacatctcttttctgtggttttcattgtcagtatgcacatgaagtttaagtcttcta
gtgggcacccagacaggggattgatgatctcctggtgaaacgcaagcataccctcttccc
cacgttataattgttccaggttcccaggtattggtttgggagtttttccataacactggc
ttgctttcattgagggataattttttgcttatgtaatagtgttcagcagcattccctgag
gaagtactttccattgataatgagctgcaggctcctgattattgatagatggtacagtaa
aagcaaattttgacaatctgatttatgtaaagcaatatgaaagaaacagtctttaagatc
aataactatgagaggccaattcttgggtattaaaggaggggcaggcatgctgggttggac
ggctcccataggtttaattacagcattaatggcccttaaatcagttaccatcctccactt
ccctgatttcttttttactagaaacacaggagaattccagggggaaagaggaggttccac
atttccaagttgtaactgttcagaaaccaattgagttaaagcctccagtttttctttaga
gagcagccactgctcaatccaaacaggtgtttcagatttccctcatagaggaacaggatt
aggaggcgtagcagtggccgtcattaaaaaggataacctaaaccagccctgtcttctttt
acggtaacttgaagaggtttggtaaatccttcatgtcttggactgagactgagtcctgga
acaaaccccatgttttccattatatgttgactgggagccctataagagttatgtggaata
ttaatttcagccccccattgtgccagcaaatctctaccccaaagattaatggggattagt
gtgatatgaggctgaattgtacccttttgaccatcagggctagtgcaaggcaagataaat
gtgctctggtgaacttcatcagcttttccaacccctactagtcccatgttagtgggatgt
ttaggccaggaggaaggccatagattagaggaaataatagaaacatcagccctagtatct
actaggccctcacacttttttccttgaatgtgtatggtgcaggtgggctgttgtttagaa
attacattaatccaataagcggctttttcaccaccagagcgcatcccagggccccgtgtc
ttatctcctttgcttaaaacaatattaggtggtaaaagtaattgagcaattgactcaccg
gatggaatggaaacaggaaccttggcagacaccataagtttaatctcattagaggaatca
gaatgagaccagtatgaaccgtgattcctttagtagtagtggatgccatacctaacacca
ggcccactgaaccttgaggtaaagggccagaaccttgaggtaaaggccccgtggggacaa
ttaaagggaaagaattaggtagtaaatttagaggaatggtactacagagattgaccgccc
cgccccctactgtggaggtagacaagtgtactgaggcagaagaagaggctgggatctatc
tgagttggctgtaggtaaatttgtgtgtgctgggggctgcgttgggaccgcttgaagtgg
aaatgcaacattggtccgagtctgaggtgtcccatttcatattggggcctgggactggcc
ccgcttcccatttccctggttctgtggcaagggatctccatctatatcagatttagaatg
gcaagtacttgcccaatgtttgcctttatgacaacaagggcaaacagtagcaggagcatt
tggctgtgtttgttgagctggcttggctgcttttaagtttttaatggtgcaattttttcg
agtatgaccaagttgaccacagttatagcaggctccaagaaaagaatcagtcgagccggt
ttgattgccgtccttcatagcccgtgcccacagaatagctttgtgggtctctgatccaat
gccttcacaagctttaatatatgcaggcaacaccttgtgatcagctaaattttgtcattg
gatggcatgcatggccattttacactcatggttcacattcttaaaagctaacatgctaac
atacaaaggagagtaccttgagcacgctcatcagagatggatttttcaacagcatgttgt
aatttagccaaaaaatcaggatataattcattgtgaccctgtttaacagtagtaaaagaa
acaggagcttgacctggggcacgtaatttatcccaagttctcatacacacctttgttact
tgttccatggtgagagcatcaaagcctaattgggaggtagtgtcagagtaattatcggat
cctgtgagctgagcctgagtaattggaatgtcatcagcccgatttagctgagcctgcaga
tgggcctcctctcaccaccaggtacggaattgtaaatgctgagatggagttagaacagct
tttgccaaaaggtcccagtctaaaggaagcaaaatgacctcagtacaaagagtctgtaat
accattttaacatatggagaaataggaccatactgagtacaagcatccttgaattctttt
aaaaaggtaagattgagcggcacatatcgatgcacttgtaccccttgagcattgggagac
tccagcgcgaccagataagccgatgcctctaatccacttgtttcttttttctggcgtaat
aagtgttgcatggaagtttcaagaacaggcacatgagatggacttggcatagaaatgaca
ggaaaagtatgtgtagataagggaaactgaggttgaggaggtcggactggtatgagagtg
tgagaaaggggcattgggggagcagaagaggcataagcatactggtgattattggctcaa
tcctgtgcaaccagagtggcaggggcgtccacgtgtgaagaagggtacagagaagcaggt
tgaatggatggcaaagtgaccaaatgagggaccgaaatgacaggagagtgaggggctgcg
gtggatgagggagggcctgcagaattacaggtaaattgtagtttggttctggagccatca
gatggctctggaagcaaaggctgcaaaggtttgaagagggaagagttagtatagatatgg
tcctgggctgtccaagccgggtccgtgggagctacaagtaccggctcctcatgaaaagaa
ataagatcattgggggtgacgttaagccaaagtcaccggagttagatattgagtcctcaa
tatcgtcaggtaggggaggagttggtgaagggagaggcttgagcagataacgaaggccga
acgggagaggaaacctgaggaagaggtagagggtcgccagactcagaaaactgtggtaac
tgcagggggttacaggattggcattttaggacagcacgtaccaaggcccaatcaccccaa
acagtgacgggagcataatttcctgttgggaccagttcctggaattttgcaccgacatga
tcccatagttccacatctaacattcccttttcaggaaaccaaggacagtgttcttccact
gccctgaataggatgtccatattttccataggtacctgaactcctccctgttttaacagg
agtttaatatagcagagataagcataatgcttagactttgcataacccatagttacccca
gacaatacacagacaactcaccaatcgtcagggagccaaacaagcatttctgtgaaccag
accaatgaacgtttctacgcacgtaccaaaaggaatcgggttcccacatgcacttgggaa
aaagaaagccacttggcatgccagatattgggggaacctgcccctaatatttcaatgtag
gttctttctattttccatgtcagctagctgagaaataaagagagacagtacaaagagagg
aattttacagctgggccgccgggggtgacatcacatatcggtaggactgtgatgcccacc
tgagtctcagaccagcaagtttttattaaaggtttcaaaaggggagggggcgtaagaaca
gggagtaggtacaaagatcacatgcttcaaagggcaaaaagcagaactactaataagggt
ctaacaaagattacagggcaaagggcaaaaacagaaccactgataagggtctatgttcag
tggtgcacgtattgtcttgataaacatcttaaacaacagaaaacagggttcgagagcaga
gaaccgatctgaccacagatttaccagggtggagtttttccccaccctagtaagcctgag
ggcactgcaggagaccagagcgtatctcactccttatctcaaccgcataagacagacgtt
cccagagtggctgtttatagacctccctccaggaatgcattcctttcccagggtattaat
attaatattccttgctaggaaaagaatttagcaatatctcgcctacttgcacatccattt
ataggctctctgcaagaagaaaaatatggctctttttgcccaacgccgcaggcagtcaga
ccttatggttgtcttcccttgttccctaaaaatcacgttattctgttctttttgaaggtg
cactgatttcatattgttcaaacacacatgttttacaatcaatttgtacagttaacacaa
ttatcacagtggtcctgaggtgacgtacatcctcagcttacgaagataacaggattaaga
gattaaagtaaagacaggcataagaaattataaaagtattatttgggaactgataaatgt
ccatgaaattttcacaattt
>chr3 79615035 79622061
gaacactgtccttggtttcctgaaaaaggaaccttagatgtagaactatgggattgtgtt
ggtgcaacattctgggaactggtctccacaggaaattatgttcctgtcactgtctggggg
gattgggccttgatacgtgccatcctaatgacataccaatcccatgaccccctagagtta
ccacaattttctgaatctgacgaccctccacctcttcctcaaccttcctctcccacacgg
cctttgttagctgatcagcctctcccttcatctactcctcccccacctaacgattctgag
acttcaatatctaactccagtgactttggattatggtcaccccccgatgaccttatttct
tttcatgaagagctggtacttgtagctcccatggccctgactcagacagcctgggaccac
atatatgctaattcttctctctttaaacctccggagtcagctaatggctccaggaccaaa
ctaaaatttacctgtaattctacaggccctcccccatccacttcagcccctccccctcct
gtcattttggttcctcaaccggtcactttgccatccattcagcctgcttctctgtaccct
tcttcacacatggacgctagtaatcaccagtatgcttctgctccttctgctcccccaata
cccctttctcacactgtcattctgctctgaccccctcaccctcagtttgccttatctaca
catgcttttcctgtcacttctatgccaactccatctcagatacctactcttgaaacttca
gtgcaatgcttattacgccaaaacaaagaaacaagtggattagatgtgtgggcttatccg
gtcatgctagaacctcccaacttccaagggatataaatgcgtcattatgtacctctaaat
cttacctttttaaaagaatttaaggatgcttgtactcagtatggtcttacttctctttat
gttaaaatggtattacaaactttttgtactgaggtcattttgcttcctttagactgggac
cttttggcaaaagctgttctaaccccatctcagcatttacaattccatacctggtagtca
gaggaggcccgtttgcaggctcagctaaatcggactaatggcattctaattactcaggct
cagctcacaggctctgatagtttctctgatacttatgcccaattaaactttgatgctctt
accacagaacaagtaacaaaggtgtgtatgagagcttgggataaattacgtgccccaggc
caagctcctgtttcttttactatagttaaacaaggtcatgctgaactataccctgatttt
ttagctaaattacaagatgctgttgaaaaatttgtctctgatgagagtgctcaaggtatt
ctccttcgtatgttagcttttgaaaatgtgaaccatgagtgtaaaatggccatgcattcc
atccaacgacaaaatttacctgatcacgaggtgttacctgcatatattaaagcttgtgaa
ggcattggttcagacacccacaaagctattctgtgggcatgggccatgaaggacaccaat
caaactggccccactaattcttttcttggagcctgctataattgaggtcaacttggtcat
actcgtaaaaattgcacttaaaaacttaaaagcggccaagttggctcagcaaacacggcc
aaatgctgctgctactgtttacccacgttgttgcaaagggaaacattgggtaagtacttg
acactctaagtatgatatagatggaaaccccctgccacagaaccagggaaatgggaagtg
gggccagtcccaggccccaatatcaaacgggatgcttcagactcagaccaacattgcgtt
tccacttcaggcggtcccaacgcagcctccagcacaaacaaatttatctacagccaaccc
agatgggtcccagcctctccttctgtctcagtacaatgcttgttcacctccacagtaggg
ggtagggtggtcaatctctgtagtaccattcctctaaatttactacctaattctttgcct
ttaattttccccatgggggtcactggccctttacctcaaggttcggtgggcctggtgtta
ggtagggcatccacctctgctaaaggaatcaccattcatactggtctcattaattctgat
tccactgatgagattaaattaatcgtgtctgccaaggttcctgtttccattccggccagt
gagtcaattgctcaattgcttttactacctaatatcattttaaacagaggagataagaca
cgtggccctgggatgggctctggtggtgaaaaggccacttattggattaatataatttct
aaacaatggcccacctgcaccatacacattcaaggaaaaaagtttgagggctgatgtttc
tattatttcctctagtttatgaccttcctcctcgcttaaacatcctgctaacatgggact
agtaggtggtggaaaagctgatgaagtttaccagagcacatttatcctgacttgcactgg
ccctgatggtcaaaaaggtacaattcagccttatatcacaccaatccccattaatcttta
gggtagagatttactggcacaatggggggctgaaattaatattctacataactcttatag
tgctcccagtcagcatgtgatggaaaacatggagtttgttcctggactcggtctcggtcc
aaaacatgaagggattactaaacccctcccaattactgtaaaagaagacagggctggttt
aggttaccctttttaatggcggccgctgccatgcctcctgatcatatccctttacaatgg
aaatctgacacacccatttggattcagcagtggccactctctaaggaaaaactggaggtt
ttcactcaattagtttctgaacagttacaacttgagaatgtggaaccttctctttttccc
tggaattctcctgtgtttctagtaaaaaagaaatcaggcaagtggcagatggtaaccgat
ttaagggccattaatgcagtaattaaacctatgggagccatccaaccctgcatgcctgcc
cctgctttaatacctaaaaattggcctctcatagttattgatcttaaagattgttttttt
catcttgctttacataaatcggactgtgaaaaatctgtttttactgtaccatctgtcaat
aatcaggagcctgcagcttgttatcaatggaaagtacttccttagggaatgctgaatagc
cccacaatctgccaactttatgttggacaagtgctttcaccagttcgagcccaatttccc
caggcctatattcttcattatattgatgacattttaattgctgcccccactgataaagaa
ttgactgactgttatcatattttgagctgccatgttacagaggctggattacacatcgct
caggagaccacattcaacagaccactcctgttcaatatttaggaagggtggtcgataaac
aacgtattcaacctcaaaaagttcacattcggagagattctttgaaaactttaaaggact
tccaaaaactcttgggtaacattaattatttaagacctactttaggtattccaacctatg
tgctgtctaacttgttttctacgctgcggggagattccaatctctgcagtcccagagctt
tgacccctgaggcgtcactataactggaattcatagacgaaagaatccagaccgcccagt
tatctagtgtacagctttctcagccttttcaacttctggttttcacttcattgcactccc
ctactgggctaatagttcaacataatgatttagtagagtggtgttttcttcctcattctg
tgtcaaaaactctgtctctttatgtggaccaaatggccattctaactggatgagctcggt
gtagaatacttaaaatttctggatttgatccgaatttaattgtagttccttgaaatcggc
tcgaagttcaagccgcctttcaacattccgtactgtggcaaattcacttggctgatttta
ttggcatttttggcaataattatccagaaaacaaattgtttgattttataaaaatgactt
cttgggtggtccctcgattgaccaaagatcagcccattcctgaggctgttacagtgttca
ctgatggctccaatgaaaatgctggttatgtaggtcctacagacaagcttatatccatcc
cttatacctctgctcaaaaggcagggttaatttctgtaattactgccttacaggatttcc
ccaaacctttaaatattgtctctgattctgattaacgtgggaaagaggatatgcttatgt
ttcaccaggagatcatcaatcccctgtctgggtgcccactagagactcaagcttcacgtg
aatactgacaacgaaaaccacaaggaaaagacatccgtgtcagagaccgccctcagacat
ggtgaaatctgtgccaactcctcagaagctggcacaccaaatcaaaatgggtctggttca
atcctccctgatggcaatggagacccatctaactaatcccacctctcctaattacctttc
tttttctccttacaaacctaaaaatctcaccatttctattaccctggaaataacatccct
ctgttcttctcttcctccttcagcactggatctcgcttacaatgggttttatttatcctt
atactttctgtctcaccagtttcctctcatactgatttacctgctccacaaaattattcc
tattgggcttatgtgccttttcctccacttattcgacctctcacctggctggatgctcct
gcagaaatctacactaatgacagtgtgtggattcctggagctacagatgaccgttgccct
gctcaaccaggagaagaaggccctgcatttaatgttactatgggttatagataccccact
ctgtgcctcagacatgcacctggttgtatccatctagaaacccaaatctgggctgcttat
cttccagagagatcagctacagaggaaccaggacatttggtctccagcatctccctttct
cctttaagacaaatgaaagggggagtaatgggagataccccatactttcaatataaacct
ggggaaaaccatgccctaaaaattttgaggccccatctaaaactttaatttgggaagact
gtgttaactcacatgcagtaatattaaaaaatgagtcatatggtttagtaatagacacgg
caccaaagggctatttaaaaaacaattgctcctctggccaagggaatgcctggaggctac
ttattttatttcttattgggagaacaaaaatcatcattctactttgcataggaggttcag
ctcagtctttcccttaaaatgggaagataaaggcattacctccccaaggcctcgtatgat
actccccattctgagcccagaacacccaaaactttggacattggctattgccatgtctgg
actgtgagtatgggaaggggaaacttttctgtctattgtccccactaccgccccctccct
cagtatcaacgtagatccagacattctgctttgcttacctccaacctgactgttcccata
cagagttgtgttaagcctcctcacatgctgttagtgggaaatatcaaaatttggacgaac
aatcaaactgtccaatgcattaattgtcatttatacacttgtattaactcctattttgac
ttcaggaaaagtgtaatgctggttcgagcttcagaaggaatctggattccggtaactttg
cccacaccttgggaatcctccccctcaatacatttaattaatgaagtgttacagcaaatt
ctagaaagatctaagagatttgttttcactttaatcgctgttataatgggcctaaataca
gtcactccaatgtccaccactgcccgaatggcattacatcaatctattcaaatggctcat
tttgttaatgattggcaagccaattccacccaaatgtggaattctcaacaaggcattgat
caaaaattggctaatcaaattaatgatttaagacagtctgttatttggcttggagatcgg
gtagtgagtctcgaacattgcatgcaaatgcagtgtgattggaatacttcagatttctgc
atcaccccatattcatataatgagactgatcattcatgggaaatggtcaaaggacacctt
ctgggtagggaagataatttatcattggacataactaaattaaagaaacaaatttttgaa
gactctcaagctcatttatccattgtgcttggagctgaggcattagatcagggggcagaa
aatctttctagactaaaccccacgacttggattaagtctactgggggctccactgtagta
aattttggaattatgcttctctgtttaatcggcttatctttactgtgtgggaccagtcaa
agaatcctgcatcaaaatcgagagaacgaacaagccttcattgccatagcacatttatat
aaaaggaaagagagcgatgttgtgggaagtcagggaccctcaacagagggaccggctgaa
gccatggcagaagaacataaattgtgaagatttcatggacattcattagttccccaaatt
aatacttttataatttcttatgcctgtctttactgcaatctctgaacacaaattgtgaag
attccatggacattgatcacttccccaatcaatactcttataatttcctatgcctgtctt
tactttaatctcttaatcccctcatcttcctaaactgaggatgtatgttgcctcaggacc
ctgtgatgagtgtgttatcggtataaatttttgtaaaacatgtgtgtttgaacaatatga
aatctgggcatcctaaaagaacagaataacagtgattttcagggaacaagggagataacc
ataaggtctgactgcctgccgagctgggcagaacagagtcatatttctcttcttgcaaaa
gtgaataggagaaatatcgctgaattatttttctcagcaaggaatagccctgggaaagga
atgcatt
>chrX 56602551 56609242
caggaaccttaggcgtagaactatgggattgtgttggtgcaacattccgggaactggtct
ccacagggaattatgttcccatcactgtttggggtgattgggccttggtacgtgccatcc
taatgacataccaatcccgtgaccccttacagttaccacagttttctgaatctgacgtcc
ctccatctcttcctcaaccttcctttcctgcacggcctttgttatctgctcaacctctcc
cttcagctactcctcccccacctgacaatgttgagaattcaatgtctaactccggtgact
ttggattacagtcaccccctgatgatcttatttcttttcactaagagccggtacctgtag
ctcacgcggccctgactcagacagcccaggaccatatatatgctaattcttctctcttca
aacctccagagtcacctaatggctccaggaccaatctacaatttacctgtaattcttcag
gccctcccctttccacttcagcccctcaccctcctgtcatttcagttcctcagccggtca
ctttgccatccactcagcctgcttctctgtacccttcttcacacacagatgccagtaatc
accagtatacttctgctccttctgctccctcaatgcccctttctcacactctcattgcgg
tctgacaacctcaccctcagtttcccttatctacacatgcttttcctgtcacttctatgc
ctactccatctcagatgtctactcttgaaacttcaatgcaatgcttattacgccaaaaca
aagaaacaagtgaattagatgcatgaacttacccggtcgtgctagacccacctaacttcc
aaggggtacaaatgcatcaacatgtacctcttaatcttacctttttaaaagaatttaagg
atgcttgtactcaatattgtcctacttctccttagttaaaatggtattacaaacttttta
tactgaggtcattttgcttcttttagactgggaccttttggcaaaagctgttctaacccc
atctcagcatttacaatttcgtacctggtggtcagaaaaggcccgtttgcaggctcagct
aaatcggactaatggcattctcattactcaggctcagctcacaggctccaatagtttctc
tgatgcttatgccaaattaaactttgatgctcttaccacggaacaagtaacaaaggtgtg
tatgagagcttgggataaattacgcactccaggccaagctcctgtttctttcaccatagt
taaacaaggtcactctgaattataccctgattttttagctaaattacaagatgctgttga
aaaatctgtctctgatgagcgcactcaaggtattctccttcgttagcttttgaaaatgcg
aaccatgagtgtaaaatggccatgccttctgtccaacgacaaaatttacctgatcaggag
gtgttgcctgtatatattaaagcttgtgaaggcattgggtaagacacccaaaaagctatt
ctgttggcatgggccatgcaggacaccaaccaaactggtcccactaattcttttcttgga
gcctgctataattgctgtcaatttggtcatactagaaaaaactgcactgttaaaaactta
aaagtggccaagctggctcaacaaacagggccaaatgctgctgctactgtttgcccatgt
tgtcacaaaggtaaacattgggcaagtaattgctgctctaagtatgatatagatggaaac
cccctgccacaatggggagcggggctggtcccaggccccaatatcaaatgggacacttca
gactcagaccaatgttgtgtttccgcttcgggtggtcccagtgcagcccccaggacaaaa
aagtttacctacagccaacccaaatgggtcccagcctctccttccgtctcagtacaatgc
tcgtccacctccacggtaggtggcaggacggtcaatctctgtagtactattcctctaaat
ttactacttaactctttgcctttaattgtccccacgggggtcactggccctttacctcaa
ggttcggtgggcctggtgttaggtagggctccacctctgctaaaggaatcaccattcata
ctggtctcattaattctgattccgttgatgagattaaattagtcgtgtctgctaaggttc
ctgcttccattccggctggtgagtcaattgctcgattgcttttactacctaatatcattt
taaacaaaggaaataagacacgtggcactgggattggctccagtggtgaaaaggccgctt
agtgaattaatataatttctaaacaacggcccacctgcaccatacacatacaaggaaaaa
agtttgagggcctagtactgaggctgatgtttctgttatttcctctagtttatggccttc
ctcctggcttaaacatcctgctaacatgggactagtaggtgtcagaaaagctgaggaagt
ttatgagagcacatttatcttgccttgcactggccatgatggtcaaaagggtacaattca
gccctatatcatgccaattcccattaatctttggggtagagatttgctggcacaatgggg
ggctgaaattaatattccacataactctcacagtgcttccagtcagcatatgatagaaaa
catggggtttgttcctggactccgtctcggtccaaaacatgaagggattactaaacccct
cccaattactgtaaaataagacagggctggtttaggttatcctttttagtggtggccact
gccaagcctcctgatcctatccctttacaatggaaatctgacacacctgtttggatagag
cagtggccactttctaaagaaaaactggaggctttaactcacttggtttctgaacagtta
caacttggaaatgtggaaccttctctttccccctggaattctcctgtgtttctagtaaaa
aagaaatcaggcaagtggcggatggtaaccgatttcaggaccattaatgctgtaattaaa
cctatgggggccgtccaatccggcatgcctgctcctgctttaatacctaaaaattggcct
ctcatgtttatttatcttaaagatttttttcatattgctttacataaatcggattgtgaa
aaatttgcttttactgtaccatctatcaataatcaggagcctgcagctcattatcaatgg
aaagtacttcctcagggaatgctaaatagccctataatctgccagcttttgttgggcaag
tgctttcaccagttcaagcccgatttccccaggcctatattcttcattgtattgatgata
ttttaatggctgtccccactgataaagaattaattgactgttattaaagtttgagccacc
atgttacagaggctggattacacattgctcaggataaaattcgactgaccactcctgttc
aatatttaggaatggtggtcaataaacaacgtattcaacctcaaaaacttcaaattagga
aagattctttgaaaactttaaatgacttccaaaaactttagggtaacattaattatttaa
tatctactttatgtattccgacctatacactgtctaacttgttttctatgctgcggggag
attccaatctccgcagtcccaggactttgacccctgaggcttcactagaactgcaattca
tagaggaaagaatcctgacctcccagttatctagagtacagctgtttcagccttttcagc
ttctggtttttgcttaattacactcccctactggactaatagttcaacataatgacttag
tggagtggtgttttcttcctcattctgtgtcaacaactttgtttatctagatcaaatggc
cactctaattggacaggcacggtgtagaatacttaagatttccagatttgatctgaattt
aatcgtagttcctttaaatcagccacctttcaacattctgtactatggcaaattcacttg
gctgattttattggcgttattgacaatcattatccaaagaacaaattgcttgattttata
aaaatgacatcttgggtggtccctcgattaaccaaagatcagcccattcctgagtctgtt
acggtgttcactgatggctccagtaatggcaatgatggttaggtaggtcctacaggcaag
cttatttctaccccttatacctctgctcaaaaggcagagttaattgctgtgattactgcc
ttacaggatttccccagacctttaaatattgtctctgattctgcttatgttgtacatgcc
actaaaaatatagaaactgctactatcaaacatactgataattctgaattggcttcttta
ttttcaaggttacaacaggcagtttgccaacgtagacaccctttctatatcacacatatt
agatctcataccactttaccaggacccatgtctgctggtaatcatgaagtcaatggtttg
gtctcttttgcaacccaagaggctcaggagttccataatctcattcatgtcaatgctgct
ggattaaaagataaatttgttcttacctggaaacaggctagcttgttgttcacagctgcc
ctcagtgccaagtttttgtacttccaaatcaggaacctggcattaatcccagaggcctaa
ctcctaatgctttattgcaaatggatgtgactcatgttagctcctttggcagactgtcat
atgtgcatgtctctgtacataccttctcaggttttatctgggctacttgccaaactgggg
aaggcacggcccatattaaaaaaaatctgtattcttgctttgcagttatggggcttccat
atcaaataaagacaggcaatacccctggatatgttagtaaggcttttgatttatttatgc
aacaatgaggactttcccatattactggaatcccttacaatcctcagggacaggctgtgg
tggaacgggccaatcgcactttaaaaacccagttgtccaaacagtctgaacaacaaaaac
ataatttaactaccacccattcccaattacatttggcattgtttactttaaatttttaaa
atgttcctaaagataataatctaactgcagccaaaggccattatacaggcaaaaaattct
ccctaaacaagggcaagcccatgttatggaaaaactcccaaaccaatacctgggaacctg
gcacaactataacatgggaaagaggatatgcttgtgtttcaccaggagatcatcaatccc
ctgtctgggtacccaccaggagactcaagctttgggtgaatactgacaacgaaaaccaca
gggaaaagacgtccatgtcagagactgccctcagatgtggtgagatctgtgccaactcct
tggaagttggcacaccaaatcacaatgggtctgattcaatcctccctgatgggaatggag
acccatctaactaatgccacttctcctgattacctttctttttctccttacaaacctaaa
aatctgaccatttctattagcctgaaaataacatccttctgttcttctcgtcctccttca
gcacccaatctcactcacactaggttttatttaatgattctcctccttatactttctgtc
tcaccagtttcctctcatactgatttacctgctaaacgaaattattcttattgggcttat
gtgccttttcctccacgtatttgacctctcacctggatggatgctcctgtggaaatctac
actaacgatagtgtgtggatgcctggacctaaagaagaccgctgccctgctcaaccagga
gaaggcactgcatttaatgttaccatgggttataaatacccccctctgtgcctcggatat
gcacctggttgtatccaggtagaaactcaaatctgggctgcttatcttctggagagatca
gctacagaagaactgggacatttggtctccagcctctccctttctcctttaaaacaaatg
aaagggggagtaatgggagataccccatactttcaatataaacctgcaggaaaaccatgc
cctaaaagttttgagggcccatctaaaaccttaatttgggaagattgtgttaactcacat
gcagtaatattaagaaatgactcatatggtttagtaatagtctgagcaccaaagggctat
ttaaaaaacaattgctcctttggcggaagggaatgcctggaggctacttgttttatttct
tatcaggagaatgagaatcatcattccacttttcataggaggttcagctcattccttccc
ttaaaatgggaagataaaggcattaccggcccccactccccgaggcctcgtatgatagcc
ccatttggagcccagaacacccagaacttcggaaattggctactgccatatctggactgc
aagtatgggtaggggaaactattctgtctgttgtccctgctaccgcccccatctctcagt
atcaacatagatccagatattctgctttacttacctccaacctgactgttctcatacaga
gttgtgttaagcctccttacatgctgttagtgggaaatatcaaaacttggacgaaaaatc
aaactgtccaatgcactaattgtcattaatacacttgtattaactcccattttgactcca
ggaaaggtgtaatgttggttcaagctcgagaaggaacctggattctgataactttgccca
gatcttgggaatcctccccctcaatacattta
>chr1 135696367 135712562
aaagaagagaaatatggctctgttctgcctggctcaccggtggtcagagtttaaggttat
ctctctagtttcctaaacattgctgttatcttgttcttttttcaaggtgcccagatttca
tattgtttaaacacacatgttctataatgtgtgcagttaatgcaattatcacatggtcct
gaggtgacatacatcctccttggctgacaggattaagagattaaagtaaagagaggcata
gtaaatcacaagggtattgactggggaagtgataagtgtccatgaaatctttacaattta
tgtttagagattgcagtaaagacaggcataagaaattatgaaagtattaatttggggaac
taataaatgtccataaaatattcacaatccacgttcttctgccatggcttcagccggtcc
ctccatttggggtccctgacttcctgcaacatctctccctttctttttatataaatgtgc
catggcaatgaaggcttgttcattctcttgattttgacacaggattctttgagtggtccg
ggacactaaaaacaagctgattaaacagagaaacatattccaaaatttactacagtggag
cccccagtagacttaatccaagtagtagggtttaatccataaagattttctgccacctga
tctaatgcctcagctccaggcacgatggataagtgagcttgagaggcttcaaaagtttgt
ttctttaatttagttatgtccaatgataaattatcttctctacctagaaggtgtcctttg
accatttcctatgaatgatcagtctcgttataggaatacggggtgatgcagaaatctgaa
gtattccaatcgcactgcatttgcatgtgatgtttgagactcactacctgatctccaagc
caaataacatactgtcttaaatcattaatttgacttgccaatttttgatggatgccttgt
tgagaattccacatttgggtggaattggcttgccaatcattaacaaaatgagccgtttga
atagattgatgtaatgccattccagcagtggtggccattgcagtgactgtaattaggccc
gtgctaacagcgattaaaatgaaaacaaatctcttagatctttttagaatttgctgtagc
acttcattaattaaatgtattggggggaggattcgcaaggtctaggtaaagttactggaa
tccagattccttctcaaactcgaaccaacattacacttttcctggagtcaaaattggagt
taattcaagtgtatagatgacaattaatgcattggaaagtttgattatttgtccaaattt
tgatatttcctactaacagcatgtaaggaggcttaacacaactctgtatgggaatagtca
ggttggaggtaagtaaagcagaatgtctgggtctatgttgatactgagagagtgggacgg
tagtgggaacaacagtcaaaatagttttcccttcccatacttgcagtccagacatggcaa
tagccaatttccaaagttctgggtgttctgggctcagaatgggtaatgcctttatcttcc
cattttaagggaaagaatgagctgatcctcctatgcaaagtagaatgatgattctcgttc
tcctgataagaaataaaataattagcctccaggaattcccttccactagaggagcaatta
ttttttaaatagccctttggtgcccagtctattactaaaccatatcagtcatttttttaa
tattactgcatgtgagttaacacaatcatcctaaattaaagttttagatgggccctcaaa
atttttagggcatggttttcctgcaggtttatattgaaagtatggggtatctcccattac
ttctcctttcatttgttttaaaggagaaagggagaggccagagactaaatgtcctatttt
atctgtagctgatgttttcggaagataagcagcctagaattgagtttctaggtggatgca
accaggtgcatgtctgaggcacagaggggggtatttataatctatggtaacattaaatac
agtgccttcttctcctggttgagcagggcaacggtcatctgtggctctaggcatctacac
actatcattagtgtagatttccgcaggagcatctatctaggtgagaggtcgaataagtgg
aggaaaaggcacataagcctaataagaataattatgtgtagcaggtaaatcagtgtgaga
ggaaactggtgagacagaaagtataaggaggatcattaatcattaattaatcattaaata
aaacctagtgtaagtgagattgagagctgaaggaggaagagaagaacagggatgttattt
tcaggctaatagaaatggtgagatttttaggtttgtaaggagaaaaagaaaatcaggaga
agtgggattagttagatgggtctccattgccatcagggaggattgatttacacctattgt
gatttggtgtgcctgtttctgaggagtcagcacagatctcaccacgtctgaaggcagtct
ctgacacagatgttttttgtctgtggttttagttgtcagtattcacctgaagcttgagtc
ttctggtgggtacctagacatgggattgatgatctcctggtgaaacacaagcatatcctc
ttccctacgttataattgtgccaggttcctaggtattggtttgagagtttttccataaca
ctgacttgccttcgtttaaggaaaattttttgcctgtataatggcgtttggctgcagtta
cagtattatctttaggaacatttaaaaaatttaaagtaaataatgccaaatgtaaatggg
agtgtggagtagttaaatcatgttttgattgttcagactgtttggacaattgggttttta
aagtgcgattggcctgttccgccacagcctgtccttgaggattgtaagggattctagtaa
tatgggaaattccttactgttgtataaatgaatcaaaagccttactaacatatccagggg
cattgtctgtctttatttgatatggaagccccataactgcaaagcaagaatacagatgtt
tttaaacatgggccatgccttcccctgtttgtcaagtagcctagataaaacctgagaagg
tatctactgagacatgcacatatgacagtctgccaaaggaactaacataagtcacatcca
tttgccatcaagcattaggagttaggcctctaggcttaacaccaggttcctgatttggaa
gtacgaagacctggcactgagggcagctgtgaacaataaacttagcctgtttctaggtaa
gagcaaatttatcttttaagccagtggcattgacatgagtgagattatggaactcctgag
cttcttgggtcattaaagacaccaaacagtcgacttcatggttaccggcagacatgggtc
ctggtaaagtggtatgagacctaatatgtgtaatatgggaagggtgtctacactggtgaa
ccacctgttgtaaccttgaaaataaagaagccaattcagaattatcaatatgtttgatag
tagcagtttctatatttttagtggcatgtacaacataagcagaatctgagactgtgggga
aaagcaagagaggtcagattgttactgtgtctgtataaaaagaagtagacataggagact
ccattttgttctgtactaagaaaaattcttctgccttgagatgctgttgatctatgacct
tacccccaaccccatgctctctgaaacatgtgctgtgtcaaactcagggttaaatggatt
aagggcagtgcaagatgtgctttgttaaacagatgcttgaaggcagcatgctcattaaga
gtcatcaccactccctaatctcaagtacccagggacacaaaaactgcggaaggctgcagg
ggcctctgcctaggaaagccaggtattgtccaaggtttctccccatgtgatagtctgaaa
tatggcctcatgggaagggaaagacctgaccgtcccccagcccgacacccgtaaagggtc
tgtgctgaggaggattagtataaaaggaaagcatgcctcttgcagttgagacaagaggaa
ggcatctgtttcctgcccatccctgggcaatggaatgtctcggtataaaacccaattgta
cgttccacctactgagatagggaaaaaccaccttagggctggaggtgggacatgcaggca
gcaatactgctttgtaaagcattgagatgtttatgtgtatgcatatctaaaagcacagca
tttaatcctttaccttgtctatgatgcaaagacctttgttcacgtgtttgtctgctgacc
ctctccccactattgtcttgtgaccctgacacatccccctcttggagaaacacccacgaa
tgatcaataaatactaagggaactcagaggctggtgggatcctccatatgctgaacgttg
gttccccgggcccccttatttctttctctatactttgtctctgtgtctttttcttttcca
agtctctcattccaccttacgagaaacacccacaggtgtggaggggcaacccaccccttc
atctggtgcccaacgtggaggcttttctctagggtgaaggtacgctcgagcgtggtcatt
gaggacaagtcaacaagagatcccgagtacatctacagtcagccttacggtaagcttgtg
cactcggaagaagctagggtgacaatggggcaaactaaaagtaaaactaaaagtaaatat
gcctcttatcttagcttcattaaaattcttttaaaaagagggggagttagagtatccacc
aaaaatctaatcaaactatttcaaacaatagaacaattttgcccatggtttccagaacaa
ggaactttagatctaaaagattggaaaagaattggtaaggaactaaaacaagcaggtagg
aagggtaatatcattccacttacagtatggaatgattggcccattattaaagcagcttta
gaaccatttcaaacagaagaagatagcgtttcagtttctgatgcccctggaagctgtata
atagattgtaatgaaaagacaaggaaaaaaatcccagaaggaaacggaaactttacattg
cgaatatgtagcagagccggtaatggctcagtcaacgcaaaatgttgactataatcaatt
acatgaggtgatatatcctgaaacgttaaaattagaaggaaaaggtccagaattagtggg
gccattagagtctaaaccacaagggccaagtcctctttcagcaggtcaggtgcccgtaac
attacaacctcaagcgcaggttagagaaaataagacccaaccgccagtagcttatcaata
ctggccaccggccgaacttcagtatcggccacccccagaaagtcagtaaggatatctagg
aatgcccccagcaccacagggcagggcgccataccctcagccgcccactaggagacaatc
ctatggcaccacctagtagacagggtagtgaattacatgaaattattgagaagtcaagaa
aggaaggagatactgaggcgtggcaattcccagtaacgttagaaccgatgccacctggag
aaggagcccaagagggagagcctctcacagttgaagccagatacaagtctttttagataa
aaatgctaaaagatatgaaagagggagtaaaacagtatggacccaactccccttatatga
ggacattattagattccattgctcatggacatagactcattccttatgattgggagattc
tggcaaaatcgtctctctcaccctctcaatttttacaatttaagacttggattgatgggg
cacaagaacaggtccgaagaaatagggctgccaatcctccagttaacatagatgcagatc
aactattaggaacaggtcaaaattggagcactattagtcaacaagcattaatgcaaaatg
aggccattgagcaagttagagctatctgccttagagcctgggaaaaaatccaagacctag
gaagcgcctgcccctcatttaatacagtaagacaaggttcaaaagagccctaccctgatt
ttgtggcaaggctccaagatgttgctcaaaagtcaattgccaatgaaaaagcccataagg
tcatagtggagttgatggcatacgaaaaggccaatcctgagtgtcaatcagccattaagc
cattaaaaggaaaggttcccacaggatcagatgtaatctcagagtatgtaaaagcccgtg
atggaattggaggagctacgcataaagctatgcttatggctcaagcaataacaggagttg
ttttaggaggacaagttagaacatttggaggaaaatgttataattgtggtcaaattggtc
atttaaaaaagaattgcccagtcttaaataaacagaatataactattcaagctactacaa
caacaggtagagagccacctgacttatgtccaagatgtaaaaaaggaaaacattgggcta
gtcaatgtcgttctaaatttgataaaaatgggcaaccattgtcgggaaactagcaaaggg
gctagtcaatgtcgttccaaatttgataaaaatgggcaaccattgtcgggaaactagtaa
agggaccagcctcaggccttgcaacaaactggggcattcccagttcagccctttgttcct
cagggttttcagggacaacaacccccactgtcccaagtacctcagggaatcagccagtta
ccacagtacaacaattgtcccccaccacaagtggcagtgcagcagtagatttatgtacta
tacaagcagtctctctgcttccaggggagcccccacaaaaaatccccacaggggtatatg
gcccgctgcctgaggagactgtaggactaatcttgggaagatcacgtctaaatctaaaag
[truncated: 5,068 more rows]
