# Supplementary material for: Comprehensive characterization of ERV-K (HML-8) in the chimpanzee genome revealed less genomic activity than humans
Source: Front Cell Infect Microbiol. 2024 Feb 22;14:1349046. doi: 10.3389/fcimb.2024.1349046 (PMC10918009; doi:10.3389/fcimb.2024.1349046)
Supplement: Supplementary file 2 [file DataSheet_2.xlsx]

## Sheet: Sheet1
Supplementary Table 1 The putatively regulated genes by provirus LTR regions.
Provirus LTR Regions	Genes	Full name	Description
chr9 31695596 31696621	ACO1	aconitase 1	The protein encoded by this gene is a bifunctional, cytosolic protein that functions as an essential enzyme in the TCA cycle and interacts with mRNA to control the levels of iron inside cells. When cellular iron levels are high, this protein binds to a 4Fe-4S cluster and functions as an aconitase. Aconitases are iron-sulfur proteins that function to catalyze the conversion of citrate to isocitrat…
chr9 84598278 84599232	KIAA1958	KIAA1958	mouse all
	HSDL2	hydroxysteroid dehydrogenase like 2	Predicted to enable oxidoreductase activity. Located in mitochondrion and peroxisome. [provided by Alliance of Genome Resources, Apr 2022]
chr11 63656712 63657676	ALDH3B2	aldehyde dehydrogenase 3 family member B2	This gene encodes a member of the aldehyde dehydrogenase family, a group of isozymes that may play a major role in the detoxification of aldehydes generated by alcohol metabolism and lipid peroxidation. The gene of this particular family member is over 10 kb in length. Altered methylation patterns at this locus have been observed in spermatozoa derived from patients exhibiting reduced fecundity. …
	UNC93B1	unc-93 homolog B1, TLR signaling regulator	This gene encodes a protein that is involved in innate and adaptive immune response by regulating toll-like receptor signaling. The encoded protein traffics nucleotide sensing toll-like receptors to the endolysosome from the endoplasmic reticulum. Deficiency of the encoded protein has been associated with herpes simplex encephalitis. [provided by RefSeq, Feb 2014]
chr1 108430301 108431271	GSTM5	glutathione S-transferase mu 5	Cytosolic and membrane-bound forms of glutathione S-transferase are encoded by two distinct supergene families. At present, eight distinct classes of the soluble cytoplasmic mammalian glutathione S-transferases have been identified: alpha, kappa, mu, omega, pi, sigma, theta and zeta. This gene encodes a glutathione S-transferase that belongs to the mu class. The mu class of enzymes functions in t…
	GSTM1	glutathione S-transferase mu 1	Cytosolic and membrane-bound forms of glutathione S-transferase are encoded by two distinct supergene families. At present, eight distinct classes of the soluble cytoplasmic mammalian glutathione S-transferases have been identified: alpha, kappa, mu, omega, pi, sigma, theta and zeta. This gene encodes a glutathione S-transferase that belongs to the mu class. The mu class of enzymes functions in t…
